# Supplementary material for: Multi-bioinformatics revealed potential biomarkers and repurposed drugs for gastric adenocarcinoma-related gastric intestinal metaplasia
Source: PubMed Central journal article supplement (PMC11535201; doi:10.1038/s41540-024-00455-0), 2024-11-04
Supplement: 41540_2024_455_MOESM1_ESM.pdf [file 41540_2024_455_MOESM1_ESM.pdf]

## **Multi-bioinformatics revealed potential biomarkers and repurposed drugs for gastric adenocarcinoma-related gastric intestinal metaplasia**

Gøran Troseth Andersen<sup>1,2,3</sup>, Aleksandr Ianevski<sup>1</sup>, Mathilde Resell<sup>1</sup>, Naris Pojskic<sup>4</sup>, Hanne-Line Rabben<sup>1</sup>, Synne Geithus<sup>1</sup>, Yosuke Kodama<sup>1</sup>, Hiroyuki Tomita<sup>5</sup>, Denis Kainov<sup>1</sup>, Jon Erik Grønbech<sup>1,2</sup>, Yoku Hayakawa<sup>6</sup>, Timothy Wang<sup>7</sup>, Chun-Mei Zhao<sup>1</sup> and Duan Chen<sup>1§</sup>

<sup>1</sup> Department of Clinical and Molecular Medicine, Norwegian University of Science and Technology (NTNU), Norway

<sup>2</sup> Department of Surgery, St. Olav's Hospital, Norway

<sup>3</sup> Department of Surgery, Namsos Hospital, Norway

<sup>4</sup> Laboratory for Bioinformatics and Biostatistics, University of Sarajevo - Institute for Genetic Engineering and Biotechnology, Bosnia and Herzegovina

<sup>5</sup> Department of Tumor Pathology, Gifu University Graduate School of Medicine, Japan

<sup>6</sup> Department of Gastroenterology, Tokyo University Hospital, Japan

<sup>7</sup> Department of Digestive and Liver Diseases and Herbert Irving Comprehensive Cancer Center, Columbia University Medical Center, USA

§ Corresponding to Duan Chen, Professor, Gastro Center of St. Olavs Hospital, Prinsesse Kristinas gate 1, 7030 Trondheim, Norway

[duan.chen@ntnu.no](mailto:duan.chen@ntnu.no)

### **SUPPLEMENTARY INFORMATION FILE:**

|          |                                                     |            |
|----------|-----------------------------------------------------|------------|
| Table S1 | Signaling pathways of GIM and GA                    | page 2-4   |
| Table S2 | 865 GA-related GIM proteins                         | page 4-23  |
| Table S3 | % genes/term of GA-related GIM                      | page 24-58 |
| Table S4 | Topological coefficient                             | page 59-64 |
| Table S5 | Hub proteins with PPI >3 in GA-related GIM          | page 65-72 |
| Table s6 | Hub protein immunohistochemistry and RNA expression | page 73-75 |

| <b>Table S1: Pathways</b>                                       | <b>GIM</b> | <b>GA</b> |
|-----------------------------------------------------------------|------------|-----------|
| Insulin Receptor Signaling                                      | -0.25      | 0         |
| Pyridoxal 5`-phosphate Savage Pathway                           | -0.27      | 0         |
| UDP-N-acetyl-D-galactosamine Biosynthesis II                    | 0          | -0.28     |
| Glucose and Glucose-1-phosphate Degradation                     | 0          | -0.28     |
| Geramide Degradation                                            | 0          | -0.28     |
| Acute Myeloid Leukemia Signaling                                | 0          | +0.38     |
| Blader Cancer Signaling                                         | 0          | +0.15     |
| PTEN Signaling                                                  | +0.27      | -0.27     |
| Dopamine Receptor Signaling                                     | 0          | -0.57     |
| Remodeling of Epithelial Adherens Junction                      | 0          | -0.52     |
| BMP Signaling Pathway                                           | 0          | -0.69     |
| UVC-induced MAPK Signaling                                      | +0.31      | -0.69     |
| Glioma Signaling                                                | +0.28      | -0.41     |
| AMPK Signaling                                                  | -0.56      | -0.07     |
| Inhibition of Angiogenesis by TSP1                              | -0.42      | -0.15     |
| Estrogen-Dependent Breast Cancer Signaling                      | -0.59      | -0.49     |
| Amyloid Processing                                              | -0.42      | -0.42     |
| Regulation of Cellular Mechanics by Calpain Protease            | +0.80      | +0.28     |
| Ovarian Cancer Signaling                                        | +0.74      | +0.28     |
| Pancreatic Cancer Signaling                                     | +0.80      | +0.27     |
| Neuregulin Signaling                                            | +0.81      | +0.14     |
| PhoA Signaling                                                  | +0.42      | 0         |
| STAT3 Pathway                                                   | +0.56      | 0         |
| IL-22 Signaling                                                 | +0.42      | +0.15     |
| Leukotriene Biosynthesis                                        | +0.77      | 0         |
| Rac Signaling                                                   | +0.79      | +0.56     |
| MIF Regulation of Innate Immunity                               | +0.83      | +0.49     |
| Fcy Receptor-Mediated Phagocytosis in Macrophages and Monocytes | +0.56      | +0.53     |
| Regulation of eIF4 and p70s6k Signaling                         | +0.56      | +0.67     |
| Salvage Pathways of Pyrimidine Ribonucleotides                  | +1.12      | +0.65     |
| NF-κB Signaling                                                 | -0.97      | +0.96     |
| Apoptosis Signaling                                             | -0.96      | +0.85     |
| HIPPO Signaling                                                 | -1.12      | +0.83     |
| Small Cell Lung Cancer Signaling                                | -0.81      | +0.59     |
| B Cell Activating Factors Signaling                             | -0.98      | +0.35     |
| P53 Signaling                                                   | -0.96      | +0.14     |
| April Mediated Signaling                                        | -0.98      | 0         |
| IL-6 Signaling                                                  | 0          | 0         |
| Oncostatin M Signaling                                          | 0          | +1.92     |
| Chondroitin Sulfate Degradation (Metazoa)                       | 0          | +1.05     |
| ATM Signaling                                                   | -0.25      | +1.08     |
| Folate Polyglutamylation                                        | 0          | +0.78     |
| Telomerase Signaling                                            | -0.25      | +0.77     |
| IL-17A Signaling in Gastrin Cells                               | 0          | +0.42     |

|                                                                 |       |       |
|-----------------------------------------------------------------|-------|-------|
| Glycogen Degradation II                                         | 0     | +0.56 |
| HGF Signaling                                                   | +0.28 | +0.56 |
| ERK/MAPK Signaling                                              | +0.35 | +1.09 |
| Wnt/ $\beta$ -catenin Signaling                                 | +0.42 | +1.12 |
| P38 MAPK Signaling                                              | +0.44 | +1.01 |
| Role of BRCA1 in DNA Damage Response                            | +4.34 | +1.16 |
| Sirtuin Signaling Pathway                                       | +0.82 | +1.26 |
| Death Receptor Signaling                                        | 0     | +1.89 |
| Purine Nucleotides De NOVO Biosynthesis II                      | 0     | +1.83 |
| Acute Phase Response Signaling                                  | 0     | +1.82 |
| Interferon Signaling                                            | 0     | +2.08 |
| Tetrahydrofolate Salvage from 5,10-methenyltetrahydrofolate     | 0     | +1.65 |
| Cell cycle Regulation by BTG Family Proteins                    | 0     | +1.54 |
| Mitosis Roles of Polo-like Kinase                               | 0     | +1.68 |
| Type 1 Diabetes Mellitus Signaling                              | +0.28 | +1.96 |
| Aging Interaction at Neuromuscular Junction                     | +0.26 | +1.51 |
| Guanosine Nucleotides Degradation                               | +1.96 | 0     |
| Mevalonate Pathway                                              | +1.96 | 0     |
| Acyl-coA Hydrolysis                                             | +1.96 | 0     |
| Sucrose Degradation V(Mammalian)                                | +1.83 | 0     |
| Cholesterol Biosynthesis II (via 24,25-dihydrolanosterol)       | +2.24 | 0     |
| Cholesterol Biosynthesis III (via Desmosterol)                  | +2.24 | 0     |
| Cholesterol Biosynthesis I                                      | +2.24 | 0     |
| Citrulline Biosynthesis                                         | +2.24 | 0     |
| Superpathway of Citrulline Metabolism                           | +2.66 | 0     |
| Stearate Biosynthesis I (Animal)                                | +2.52 | -0.25 |
| NRF2-Mediated Oxidative Stress Response                         | +1.59 | +0.40 |
| $\gamma$ -glutamyl Cycle                                        | +1.61 | +0.40 |
| CDK5 Signaling                                                  | +1.54 | +0.41 |
| D-myo-inositol (1,4,5)-tris phosphate Degradation               | +1.60 | +0.28 |
| Ceramide Signaling                                              | +1.57 | +0.25 |
| Glycolysis                                                      | +2.05 | +0.25 |
| D-myo-inositol-5-phosphate Metabolism                           | +1.76 | +0.25 |
| Glycogen Degradation                                            | +1.96 | +0.56 |
| $\gamma$ -linolenate Biosynthesis II (Animal)                   | +1.33 | 0     |
| IGF-1 Signaling                                                 | +1.26 | 0     |
| 14-3-3-Mediated Signaling                                       | +1.47 | 0     |
| CD27 Signaling in Lymphocytes                                   | +0.98 | -0.37 |
| Superpathway of D-myo-inositol(1,4,5)-tris phosphate Metabolism | +1.40 | -0.54 |
| D-myo-inositol(1,4,5,6)-tetrakisphosphate Biosynthesis          | +1.75 | +1.12 |
| D-myo-inositol(3,4,5,6)-tetrakisphosphate Biosynthesis          | +1.12 | +1.12 |
| 3-phosphoinositide Degradation                                  | +1.67 | +0.91 |
| Ephrin Receptor Signaling                                       | +1.33 | +1.19 |
| mTOR Signaling                                                  | +1.33 | +1.26 |

|                                                                    |       |       |
|--------------------------------------------------------------------|-------|-------|
| Induction of Apoptosis by HIV I                                    | +1.24 | +1.55 |
| Pyrimidine Ribonucleotides De NOVO Biosynthesis                    | +2.27 | +1.44 |
| Pyrimidine Ribonucleotides Interconversion                         | +2.26 | +1.28 |
| Apelin Liver Signaling Pathway                                     | +1.96 | +1.96 |
| IL-8 Signaling                                                     | +1.54 | +2.38 |
| 2-oxobutanoate Degradation                                         | 0     | -1.61 |
| Methylmalonyl Pathway                                              | 0     | -1.61 |
| Leucine Degradation                                                | 0     | -1.54 |
| Oleate Biosynthesis II (Animal)                                    | 0     | -1.54 |
| Complement System                                                  | 0     | -1.68 |
| Role of CHK Proteins in Cell Cycle Check-point control             | +0.31 | -1.40 |
| Aldosterone Signaling in Epithelial Cells                          | +0.71 | -1.96 |
| Gluconeogenesis I                                                  | +1.38 | -0.96 |
| Cell cycle: G2/SM DNA Damage Checkpoint Regulation                 | +1.41 | -0.98 |
| Phenylalanine Degradation IV (Mammalin, via Side Chain)            | +1.27 | -1.26 |
| Cell Cycle: G1/S Checkpoint Regulation                             | +0.84 | -1.12 |
| D-myo-inositol(1,3,4)-trisphosphate Biosynthesis                   | +0.81 | -0.84 |
| Methylglyoxal Degradation III                                      | +1.96 | -1.68 |
| Valine Degradation                                                 | +2.02 | -1.53 |
| Glutathione-Mediated Detoxification                                | +1.61 | -1.68 |
| Colanic Acid Building Block Biosynthesis                           | +1.96 | -1.26 |
| Bile Biosynthesis, Neural Pathway                                  | +2.24 | -1.26 |
| Acid Fatty Acid $\beta$ -Oxidation                                 | +2.63 | -1.54 |
| Bupropion Degradation                                              | +2.66 | -1.82 |
| Aceton Degradation (to Methylglyoxal)                              | +2.92 | -1.68 |
| Thyroid Hormone Metabolism II (via Conjugation and/or Degradation) | +3.36 | -1.26 |
| Glutaryl-coA Degradation                                           | +2.24 | -0.84 |
| Superpathway of Cholesterol Biosynthesis                           | +2.94 | -0.56 |
| Granzyme B Signaling                                               | 0     | +2.66 |
| P13K/AKT Signaling                                                 | 0     | +2.66 |
| Inflammasome Pathway                                               | 0     | +2.73 |
| GP6 Signaling Pathway                                              | +0.72 | +2.66 |
| TREM 1 Signaling                                                   | 0     | +3.36 |
| NER Pathway                                                        | -0.68 | +1.75 |
| EIF2 Signaling                                                     | -1.12 | +1.67 |
| Estrogen-Mediated S-Phase Entry                                    | -0.99 | +2.45 |
| Cycling and Cell Cycle Regulation                                  | -1.05 | +2.52 |
| Dematan Sulfate Degradation (Metaz)                                | -1.96 | +0.70 |
| LPS/IL-1- Mediated Inhibition of RXR Function                      | -2.38 | +0.91 |
| Ary Hydrocarbon Receptor Signaling                                 | -1.54 | +0.98 |
| Toll-like Receptor Signaling                                       | -2.1  | +1.64 |
| Nicotine Degradation III                                           | +3.71 | -2.31 |
| Nicotine Degradation II                                            | +3.85 | -2.52 |
| Estrogen Biosynthesis                                              | +3.43 | -2.03 |
| Superpathway Of Melatonin Degradation                              | +4.76 | -2.52 |

|                           |        |       |
|---------------------------|--------|-------|
| Melatonin Degradation     | +4.2   | -2.52 |
| Serotonin Degradation     | +4.2   | -3.22 |
| TCA Cycle II (Eukaryotic) | +2.632 | -2.66 |

**Table S2: List of IPA genes in GA-related GIM**

|             |
|-------------|
| 1. AES      |
| 2. ANKRD6   |
| 3. ARID1A   |
| 4. ARR3     |
| 5. ARRB1    |
| 6. ARRB2    |
| 7. AXIN1    |
| 8. BCL9     |
| 9. BTRC     |
| 10. CDH1    |
| 11. CDH10   |
| 12. CDH11   |
| 13. CDH12   |
| 14. CDH13   |
| 15. CDH15   |
| 16. CDH16   |
| 17. CDH17   |
| 18. CDH18   |
| 19. CDH19   |
| 20. CDH2    |
| 21. CDH20   |
| 22. CDH22   |
| 23. CDH23   |
| 24. CDH24   |
| 25. CDH3    |
| 26. CDH4    |
| 27. CDH5    |
| 28. CDH6    |
| 29. CDH7    |
| 30. CDH8    |
| 31. CDH9    |
| 32. CDHR1   |
| 33. CDHR2   |
| 34. CELSR1  |
| 35. CELSR2  |
| 36. CELSR3  |
| 37. CER1    |
| 38. CHD1L   |
| 39. CREBBP  |
| 40. CSNK1A1 |

|     |          |
|-----|----------|
| 41. | CSNK1A1L |
| 42. | CSNK1D   |
| 43. | CSNK1G2  |
| 44. | CSNK1G3  |
| 45. | CSNK2A1  |
| 46. | CSNK2A2  |
| 47. | CSNK2B   |
| 48. | CTBP1    |
| 49. | CTBP2    |
| 50. | CTNNA1   |
| 51. | CTNNA2   |
| 52. | CTNNA3   |
| 53. | CTNNAL1  |
| 54. | CTNNB1   |
| 55. | DACT1    |
| 56. | DCHS1    |
| 57. | DVL1     |
| 58. | DVL2     |
| 59. | DVL3     |
| 60. | EP300    |
| 61. | EP400    |
| 62. | FAT1     |
| 63. | FAT2     |
| 64. | FAT3     |
| 65. | FBXW11   |
| 66. | FRZB     |
| 67. | FZD1     |
| 68. | FZD10    |
| 69. | FZD2     |
| 70. | FZD3     |
| 71. | FZD4     |
| 72. | FZD5     |
| 73. | FZD6     |
| 74. | FZD7     |
| 75. | FZD8     |
| 76. | FZD9     |
| 77. | GNA11    |
| 78. | GNA14    |
| 79. | GNA15    |
| 80. | GNAQ     |
| 81. | GNB1     |
| 82. | GNB2     |
| 83. | GNB3     |
| 84. | GNB4     |
| 85. | GNG10    |
| 86. | GNG12    |

|      |         |
|------|---------|
| 87.  | GNG13   |
| 88.  | GNG2    |
| 89.  | GNG3    |
| 90.  | GNG4    |
| 91.  | GNG5    |
| 92.  | GNG7    |
| 93.  | GNG8    |
| 94.  | GSK3B   |
| 95.  | HDAC1   |
| 96.  | HDAC2   |
| 97.  | HDAC3   |
| 98.  | HDAC8   |
| 99.  | HELLS   |
| 100. | HLTF    |
| 101. | INO80   |
| 102. | ITPR1   |
| 103. | ITPR2   |
| 104. | ITPR3   |
| 105. | KREMEN1 |
| 106. | KREMEN2 |
| 107. | LEF1    |
| 108. | LRP5    |
| 109. | LRP6    |
| 110. | MAP3K7  |
| 111. | NFATC1  |
| 112. | NFATC2  |
| 113. | NFATC3  |
| 114. | NFATC4  |
| 115. | NKD1    |
| 116. | NKD2    |
| 117. | NLK     |
| 118. | PCDH1   |
| 119. | PCDH10  |
| 120. | PCDH11X |
| 121. | PCDH11Y |
| 122. | PCDH12  |
| 123. | PCDH15  |
| 124. | PCDH18  |
| 125. | PCDH19  |
| 126. | PCDH20  |
| 127. | PCDH7   |
| 128. | PCDH8   |
| 129. | PCDH9   |
| 130. | PCDHA1  |
| 131. | PCDHA10 |
| 132. | PCDHA11 |

|               |
|---------------|
| 133. PCDHA12  |
| 134. PCDHA13  |
| 135. PCDHA2   |
| 136. PCDHA3   |
| 137. PCDHA4   |
| 138. PCDHA5   |
| 139. PCDHA6   |
| 140. PCDHA7   |
| 141. PCDHA8   |
| 142. PCDHA9   |
| 143. PCDHAC1  |
| 144. PCDHAC2  |
| 145. PCDHB1   |
| 146. PCDHB10  |
| 147. PCDHB11  |
| 148. PCDHB12  |
| 149. PCDHB13  |
| 150. PCDHB14  |
| 151. PCDHB15  |
| 152. PCDHB16  |
| 153. PCDHB2   |
| 154. PCDHB3   |
| 155. PCDHB4   |
| 156. PCDHB5   |
| 157. PCDHB6   |
| 158. PCDHB7   |
| 159. PCDHB8   |
| 160. PCDHGA1  |
| 161. PCDHGA10 |
| 162. PCDHGA11 |
| 163. PCDHGA12 |
| 164. PCDHGA2  |
| 165. PCDHGA3  |
| 166. PCDHGA5  |
| 167. PCDHGA6  |
| 168. PCDHGA7  |
| 169. PCDHGA8  |
| 170. PCDHGB1  |
| 171. PCDHGB2  |
| 172. PCDHGB4  |
| 173. PCDHGB6  |
| 174. PCDHGB7  |
| 175. PCDHGC3  |
| 176. PCDHGC4  |
| 177. PCDHGC5  |
| 178. PLCB1    |



|               |
|---------------|
| 179. PLCB2    |
| 180. PLCB3    |
| 181. PLCB4    |
| 182. PPP2CA   |
| 183. PPP2CB   |
| 184. PPP2R5A  |
| 185. PPP2R5B  |
| 186. PPP2R5C  |
| 187. PPP2R5D  |
| 188. PPP2R5E  |
| 189. PPP3CA   |
| 190. PPP3CB   |
| 191. PPP3CC   |
| 192. PPP3R1   |
| 193. PPP3R2   |
| 194. PRKCA    |
| 195. PRKCB    |
| 196. PRKCD    |
| 197. PRKCE    |
| 198. PRKCG    |
| 199. PRKCH    |
| 200. PRKCI    |
| 201. PRKCQ    |
| 202. PRKCZ    |
| 203. PYGO1    |
| 204. PYGO2    |
| 205. SAG      |
| 206. SFRP1    |
| 207. SFRP2    |
| 208. SFRP4    |
| 209. SFRP5    |
| 210. SIAH1    |
| 211. SMAD1    |
| 212. SMAD4    |
| 213. SMARCA1  |
| 214. SMARCA2  |
| 215. SMARCA4  |
| 216. SMARCA5  |
| 217. SMARCAL1 |
| 218. SMARCB1  |
| 219. SMARCC1  |
| 220. SMARCC2  |
| 221. SMARCD1  |
| 222. SMARCD2  |
| 223. SMARCD3  |
| 224. SMARCE1  |

|              |
|--------------|
| 225. SRCAP   |
| 226. TBL1X   |
| 227. TBL1XR1 |
| 228. TBL1Y   |
| 229. TCF7L1  |
| 230. TCF7L2  |
| 231. TLE1    |
| 232. TLE2    |
| 233. TLE3    |
| 234. TLE4    |
| 235. TLE6    |
| 236. WNT1    |
| 237. WNT10A  |
| 238. WNT10B  |
| 239. WNT11   |
| 240. WNT16   |
| 241. WNT2    |
| 242. WNT2B   |
| 243. WNT3    |
| 244. WNT3A   |
| 245. WNT4    |
| 246. WNT5A   |
| 247. WNT5B   |
| 248. WNT6    |
| 249. WNT7A   |
| 250. WNT7B   |
| 251. WNT8A   |
| 252. WNT8B   |
| 253. WNT9A   |
| 254. WNT9B   |
| 255. ATF2    |
| 256. CDC42   |
| 257. CREB1   |
| 258. DDIT3   |
| 259. ELK1    |
| 260. H3F3A   |
| 261. H3F3B   |
| 262. HMGN1   |
| 263. HRAS    |
| 264. HSPB1   |
| 265. MAP2K4  |
| 266. MAP2K6  |
| 267. MAP3K1  |
| 268. MAP3K5  |
| 269. MAP3K9  |
| 270. MAPK14  |

|                    |
|--------------------|
| 271. MAPKAPK2      |
| 272. MAPKAPK5      |
| 273. MAX           |
| 274. MEF2A         |
| 275. MEF2BNB-MEF2B |
| 276. MEF2C         |
| 277. MEF2D         |
| 278. MKNK1         |
| 279. MYC           |
| 280. NR2C2         |
| 281. PLA2G1B       |
| 282. RAC1          |
| 283. RPS6KA5       |
| 284. STAT1         |
| 285. ATM           |
| 286. ATR           |
| 287. BRCA1         |
| 288. BRCA2         |
| 289. CHEK1         |
| 290. CHEK2         |
| 291. FANCA         |
| 292. FANCC         |
| 293. FANCD2        |
| 294. FANCE         |
| 295. FANCF         |
| 296. FANCG         |
| 297. HUS1          |
| 298. MRE11A        |
| 299. NBN           |
| 300. RAD1          |
| 301. RAD17         |
| 302. RAD50         |
| 303. RAD51         |
| 304. RAD9A         |
| 305. TP53          |
| 306. TREX1         |
| 307. AKR7A2        |
| 308. CRYZ          |
| 309. FOS           |
| 310. FXRD2         |
| 311. GSTA2         |
| 312. HMOX1         |
| 313. HMOX2         |
| 314. JUN           |
| 315. KEAP1         |
| 316. MAFF          |

|               |
|---------------|
| 317. MAFG     |
| 318. MAFK     |
| 319. NFE2L2   |
| 320. POR      |
| 321. UGT1A6   |
| 322. CNDP2    |
| 323. GCLC     |
| 324. GCLM     |
| 325. GGCT     |
| 326. GGT5     |
| 327. GSS      |
| 328. OPLAH    |
| 329. ADCY1    |
| 330. ADRBK1   |
| 331. CAMK2B   |
| 332. CDK5     |
| 333. CDK5R1   |
| 334. DRD1     |
| 335. DRD2     |
| 336. GNAS     |
| 337. GNGT1    |
| 338. GRM1     |
| 339. NCS1     |
| 340. PPP1CA   |
| 341. PPP1R1B  |
| 342. PRKACB   |
| 343. PRKACG   |
| 344. ACTB     |
| 345. ACTG1    |
| 346. ACTR2    |
| 347. ACTR3    |
| 348. ADAM10   |
| 349. ANKS1A   |
| 350. AP2A1    |
| 351. AP2A2    |
| 352. AP2B1    |
| 353. AP2M1    |
| 354. AP2S1    |
| 355. APH1A    |
| 356. APH1B    |
| 357. ARHGEF28 |
| 358. ARHGEF7  |
| 359. ARPC1A   |
| 360. ARPC2    |
| 361. ARPC3    |
| 362. ARPC5    |

|             |
|-------------|
| 363. CFL1   |
| 364. CHN1   |
| 365. CRK    |
| 366. DNM1   |
| 367. EFNA1  |
| 368. EFNA2  |
| 369. EFNA3  |
| 370. EFNA4  |
| 371. EFNA5  |
| 372. EFNB1  |
| 373. EFNB2  |
| 374. EFNB3  |
| 375. EPHA1  |
| 376. EPHA10 |
| 377. EPHA2  |
| 378. EPHA3  |
| 379. EPHA4  |
| 380. EPHA5  |
| 381. EPHA6  |
| 382. EPHA7  |
| 383. EPHA8  |
| 384. EPHB1  |
| 385. EPHB2  |
| 386. EPHB3  |
| 387. EPHB4  |
| 388. EPHB6  |
| 389. FYN    |
| 390. GIT1   |
| 391. GRIN1  |
| 392. GRIN2B |
| 393. ITSN1  |
| 394. KALRN  |
| 395. LIMK1  |
| 396. LYN    |
| 397. MMP2   |
| 398. MMP9   |
| 399. MYH10  |
| 400. MYH11  |
| 401. MYH14  |
| 402. MYH9   |
| 403. MYL12A |
| 404. MYL12B |
| 405. MYL6   |
| 406. MYL9   |
| 407. NCK2   |
| 408. NCSTN  |

|               |
|---------------|
| 409. NGEF     |
| 410. PAK1     |
| 411. PAK3     |
| 412. PSEN2    |
| 413. PSENEN   |
| 414. PTK2     |
| 415. PTPN11   |
| 416. RASA1    |
| 417. RHOA     |
| 418. ROCK1    |
| 419. ROCK2    |
| 420. SDC2     |
| 421. SDCBP    |
| 422. SIPA1L1  |
| 423. SRC      |
| 424. SS18     |
| 425. TIAM1    |
| 426. VAV2     |
| 427. VAV3     |
| 428. WASL     |
| 429. YES1     |
| 430. AKT1     |
| 431. EIF3A    |
| 432. EIF4A1   |
| 433. EIF4B    |
| 434. EIF4E    |
| 435. EIF4EBP1 |
| 436. EIF4G1   |
| 437. FKBP1A   |
| 438. GH1      |
| 439. GHR      |
| 440. IRS1     |
| 441. MTOR     |
| 442. PDK2     |
| 443. PDPK1    |
| 444. PIK3CA   |
| 445. PIK3R1   |
| 446. PTEN     |
| 447. RHEB     |
| 448. RPS6     |
| 449. RPS6KB1  |
| 450. TSC1     |
| 451. TSC2     |
| 452. ADIPOQ   |
| 453. AGTR1    |
| 454. APLN     |

|               |
|---------------|
| 455. APLNR    |
| 456. ATF4     |
| 457. AVP      |
| 458. BMPR2    |
| 459. COL1A1   |
| 460. CRP      |
| 461. GHRL     |
| 462. HIF1A    |
| 463. IGF1     |
| 464. LEP      |
| 465. MIR224   |
| 466. NAMPT    |
| 467. OPRK1    |
| 468. PPARG    |
| 469. RETN     |
| 470. AGR2     |
| 471. AMOT     |
| 472. AMOTL2   |
| 473. AREG     |
| 474. CTGF     |
| 475. DICER1   |
| 476. EGFR     |
| 477. FRMD6    |
| 478. GFER     |
| 479. HMMR     |
| 480. HPCA     |
| 481. ILK      |
| 482. LATS1    |
| 483. LATS2    |
| 484. MARK1    |
| 485. MIR31    |
| 486. MOB1A    |
| 487. NEK2     |
| 488. NEWENTRY |
| 489. NF2      |
| 490. NPHP4    |
| 491. PHLPP1   |
| 492. PJA2     |
| 493. PKP2     |
| 494. PTPN14   |
| 495. RASSF1   |
| 496. RASSF6   |
| 497. RB1      |
| 498. SAV1     |
| 499. STK3     |
| 500. STK4     |

|              |
|--------------|
| 501. TEAD1   |
| 502. TEAD4   |
| 503. TGFB1   |
| 504. VPRBP   |
| 505. WWTR1   |
| 506. YAP1    |
| 507. YY1AP1  |
| 508. ABCF1   |
| 509. ATF5    |
| 510. BZW2    |
| 511. EEF1E1  |
| 512. EIF1    |
| 513. EIF1AX  |
| 514. EIF2A   |
| 515. EIF2AK2 |
| 516. EIF2B1  |
| 517. EIF2S1  |
| 518. EIF2S2  |
| 519. EIF2S3  |
| 520. EIF5    |
| 521. MCL1    |
| 522. VEGFA   |
| 523. CCNH    |
| 524. CDKN1A  |
| 525. CUL4A   |
| 526. CUL4B   |
| 527. DDB1    |
| 528. DDB2    |
| 529. E2F1    |
| 530. ERCC1   |
| 531. ERCC2   |
| 532. ERCC3   |
| 533. ERCC4   |
| 534. ERCC5   |
| 535. GLI1    |
| 536. GTF2H4  |
| 537. H2AFX   |
| 538. HMGB1   |
| 539. MDM2    |
| 540. MIR192  |
| 541. MMS19   |
| 542. PARP1   |
| 543. RNF2    |
| 544. RPA1    |
| 545. SIRT1   |
| 546. TP63    |



|               |
|---------------|
| 547. USP7     |
| 548. VCP      |
| 549. XPA      |
| 550. XPC      |
| 551. XRCC1    |
| 552. CDKN1B   |
| 553. CORO1B   |
| 554. CSPG5    |
| 555. ERBB2    |
| 556. ERBB3    |
| 557. ERBB4    |
| 558. L1CAM    |
| 559. MIR145   |
| 560. MUC4     |
| 561. NRG1     |
| 562. NRG3     |
| 563. NRG4     |
| 564. P2RY2    |
| 565. PRKD1    |
| 566. RNF41    |
| 567. SLC1A6   |
| 568. TNF      |
| 569. TRPV1    |
| 570. YY1      |
| 571. ABI1     |
| 572. ABL1     |
| 573. ADGRA2   |
| 574. AIRE     |
| 575. AJUBA    |
| 576. ARF6     |
| 577. ARHGAP24 |
| 578. ARHGAP32 |
| 579. AXL      |
| 580. BAIAP2   |
| 581. BAIAP2L1 |
| 582. BCAR1    |
| 583. BCAR3    |
| 584. BCL2     |
| 585. BCR      |
| 586. CADM1    |
| 587. CASP3    |
| 588. CCL2     |
| 589. CCL5     |
| 590. CCND1    |
| 591. CCR1     |
| 592. CCR5     |

|              |
|--------------|
| 593. CEP135  |
| 594. CHN2    |
| 595. CHUK    |
| 596. CTNND1  |
| 597. CTTN    |
| 598. CXCL12  |
| 599. CXCR4   |
| 600. DOCK1   |
| 601. DOCK2   |
| 602. ELMO1   |
| 603. ELMO2   |
| 604. ENOX2   |
| 605. F2      |
| 606. FER     |
| 607. FMNL1   |
| 608. FN1     |
| 609. FSCN1   |
| 610. GRASP   |
| 611. HRH1    |
| 612. IL10    |
| 613. IL1B    |
| 614. ITGA2B  |
| 615. ITGA4   |
| 616. ITGB1   |
| 617. ITGB3   |
| 618. KIT     |
| 619. LCK     |
| 620. LPAR1   |
| 621. MAPK8   |
| 622. MIR149  |
| 623. MIR21   |
| 624. MTSS1   |
| 625. NCF2    |
| 626. NCKIPSD |
| 627. NFKB1   |
| 628. NISCH   |
| 629. NOX1    |
| 630. NOX5    |
| 631. NOXA1   |
| 632. OCRL    |
| 633. PARVB   |
| 634. PDGFB   |
| 635. PIK3CG  |
| 636. PIP5K1A |
| 637. PIP5K1C |
| 638. PLAU    |

|              |
|--------------|
| 639. PLAUR   |
| 640. PLCG2   |
| 641. F2RL1   |
| 642. KITLG   |
| 643. MIF     |
| 644. NME1    |
| 645. TXN     |
| 646. ADAM17  |
| 647. ANGPT2  |
| 648. ANKS1B  |
| 649. APC     |
| 650. AR      |
| 651. ARHGEF4 |
| 652. BIRC5   |
| 653. BMP7    |
| 654. BMPR1B  |
| 655. C3      |
| 656. CD40LG  |
| 657. CD44    |
| 658. CDKN2A  |
| 659. CFTR    |
| 660. CLIP1   |
| 661. CNKSR3  |
| 662. COL3A1  |
| 663. CSF1    |
| 664. CXCL8   |
| 665. CYP19A1 |
| 666. DLL4    |
| 667. EGF     |
| 668. EGR1    |
| 669. EREG    |
| 670. ETS1    |
| 671. EZR     |
| 672. FAS     |
| 673. FGF2    |
| 674. FGF7    |
| 675. FLT3LG  |
| 676. FPR2    |
| 677. FURIN   |
| 678. GAB1    |
| 679. GINGF3  |
| 680. GRP     |
| 681. HEY2    |
| 682. HGF     |
| 683. HGFAC   |
| 684. HLX     |

|               |
|---------------|
| 685. HPN      |
| 686. HPSE     |
| 687. ID1      |
| 688. IGF1R    |
| 689. IL11     |
| 690. IL1RN    |
| 691. IL32     |
| 692. IL6      |
| 693. IPCEF1   |
| 694. ITGA2    |
| 695. ITGB2    |
| 696. ITGB4    |
| 697. JUNB     |
| 698. KIF5B    |
| 699. KLF4     |
| 700. KLF6     |
| 701. KRAS     |
| 702. LIF      |
| 703. LUM      |
| 704. MACC1    |
| 705. MAPK1    |
| 706. MET      |
| 707. MIR199A1 |
| 708. MIR200C  |
| 709. MIR27B   |
| 710. MIR519C  |
| 711. MMP1     |
| 712. MMP3     |
| 713. MMP7     |
| 714. MMP8     |
| 715. MYD88    |
| 716. NFYC     |
| 717. NOTCH1   |
| 718. NOTCH3   |
| 719. NOX4     |
| 720. PAK2     |
| 721. PAK6     |
| 722. PDGFA    |
| 723. PGF      |
| 724. PLG      |
| 725. PROM1    |
| 726. PTGS2    |
| 727. PXN      |
| 728. RELA     |
| 729. RGMB     |
| 730. S1PR1    |

|               |
|---------------|
| 731. S1PR2    |
| 732. S1PR3    |
| 733. SDC1     |
| 734. SERPINE1 |
| 735. SHC1     |
| 736. SKIL     |
| 737. SLC2A4   |
| 738. SMAD2    |
| 739. SMYD3    |
| 740. SNAI1    |
| 741. SP1      |
| 742. SPINT1   |
| 743. SPINT2   |
| 744. SPP1     |
| 745. ST14     |
| 746. STAT3    |
| 747. TGIF1    |
| 748. THBS1    |
| 749. TICAM2   |
| 750. TIMP1    |
| 751. TLR4     |
| 752. WASF2    |
| 753. XIAP     |
| 754. AFP      |
| 755. ALDH1A1  |
| 756. CALB2    |
| 757. CD24     |
| 758. CLDN7    |
| 759. EPCAM    |
| 760. ERAP2    |
| 761. FOLR1    |
| 762. GPA33    |
| 763. GPNMB    |
| 764. IFNAR2   |
| 765. KRT19    |
| 766. MAML1    |
| 767. MLH1     |
| 768. MSH2     |
| 769. PTTG1    |
| 770. TSPAN8   |
| 771. VCAM1    |
| 772. WISP1    |
| 773. ABCA1    |
| 774. SREBF1   |
| 775. ADPGK    |
| 776. AGL      |

|                      |
|----------------------|
| 777. B4GALT1         |
| 778. B4GALT2         |
| 779. G6PC            |
| 780. G6PC2           |
| 781. G6PC3           |
| 782. GAA             |
| 783. GANAB           |
| 784. GANC            |
| 785. GBA             |
| 786. GBA2            |
| 787. GBA3            |
| 788. GCK             |
| 789. GCKR            |
| 790. GLA             |
| 791. GPI             |
| 792. HK1             |
| 793. HK2             |
| 794. HK3             |
| 795. HKDC1           |
| 796. LALBA           |
| 797. LCT             |
| 798. MGAM            |
| 799. MOGS            |
| 800. PGM1            |
| 801. SI              |
| 802. SLC2A1          |
| 803. TREH            |
| 804. HSD17B1         |
| 805. ADH1B           |
| 806. ADH6            |
| 807. ALDH2           |
| 808. ALDH3A2         |
| 809. MAOA            |
| 810. SULT1A1         |
| 811. SULT1A2         |
| 812. UGT2B11         |
| 813. ABCC2           |
| 814. CHST5           |
| 815. CYP3A4          |
| 816. PPP1R14D        |
| 817. SULT1A3/SULT1A4 |
| 818. UGT1A1          |
| 819. UGT2B7          |
| 820. UGT2B17         |
| 821. CLDN3           |
| 822. HLA-DPB1        |

|               |
|---------------|
| 823. HLA-DQB1 |
| 824. HLA-DPA1 |
| 825. HLA-DMB  |
| 826. RPS13    |
| 827. RPL22    |
| 828. RPL13A   |
| 829. RPL11    |
| 830. RPL38    |
| 831. RPS7     |
| 832. RPL6     |
| 833. RPL26    |
| 834. RPL5     |
| 835. RPS3     |
| 836. PCBD1    |
| 837. RPL23    |
| 838. RPL10A   |
| 839. KLF5     |
| 840. RPL14    |
| 841. RPL1     |
| 842. RPS20    |
| 843. EEF1A1   |
| 844. RPS23    |
| 845. RPL15    |
| 846. FGFR4    |
| 847. RPL35A   |
| 848. RPL9     |
| 849. RPS15A   |
| 850. RPSA     |
| 851. SOCS3    |
| 852. RPS25    |
| 853. RPL37    |
| 854. RPL30    |
| 855. APP      |
| 856. RPLP1    |
| 857. RPS5     |
| 858. RPS24    |
| 859. RPL13    |
| 860. IGFBP4   |
| 861. CYSTM1   |
| 862. DDC      |
| 863. RPS14    |
| 864. WFDC2    |
| 865. RBM47    |

**Table S3 List of % genes per term in GA-related GIM**

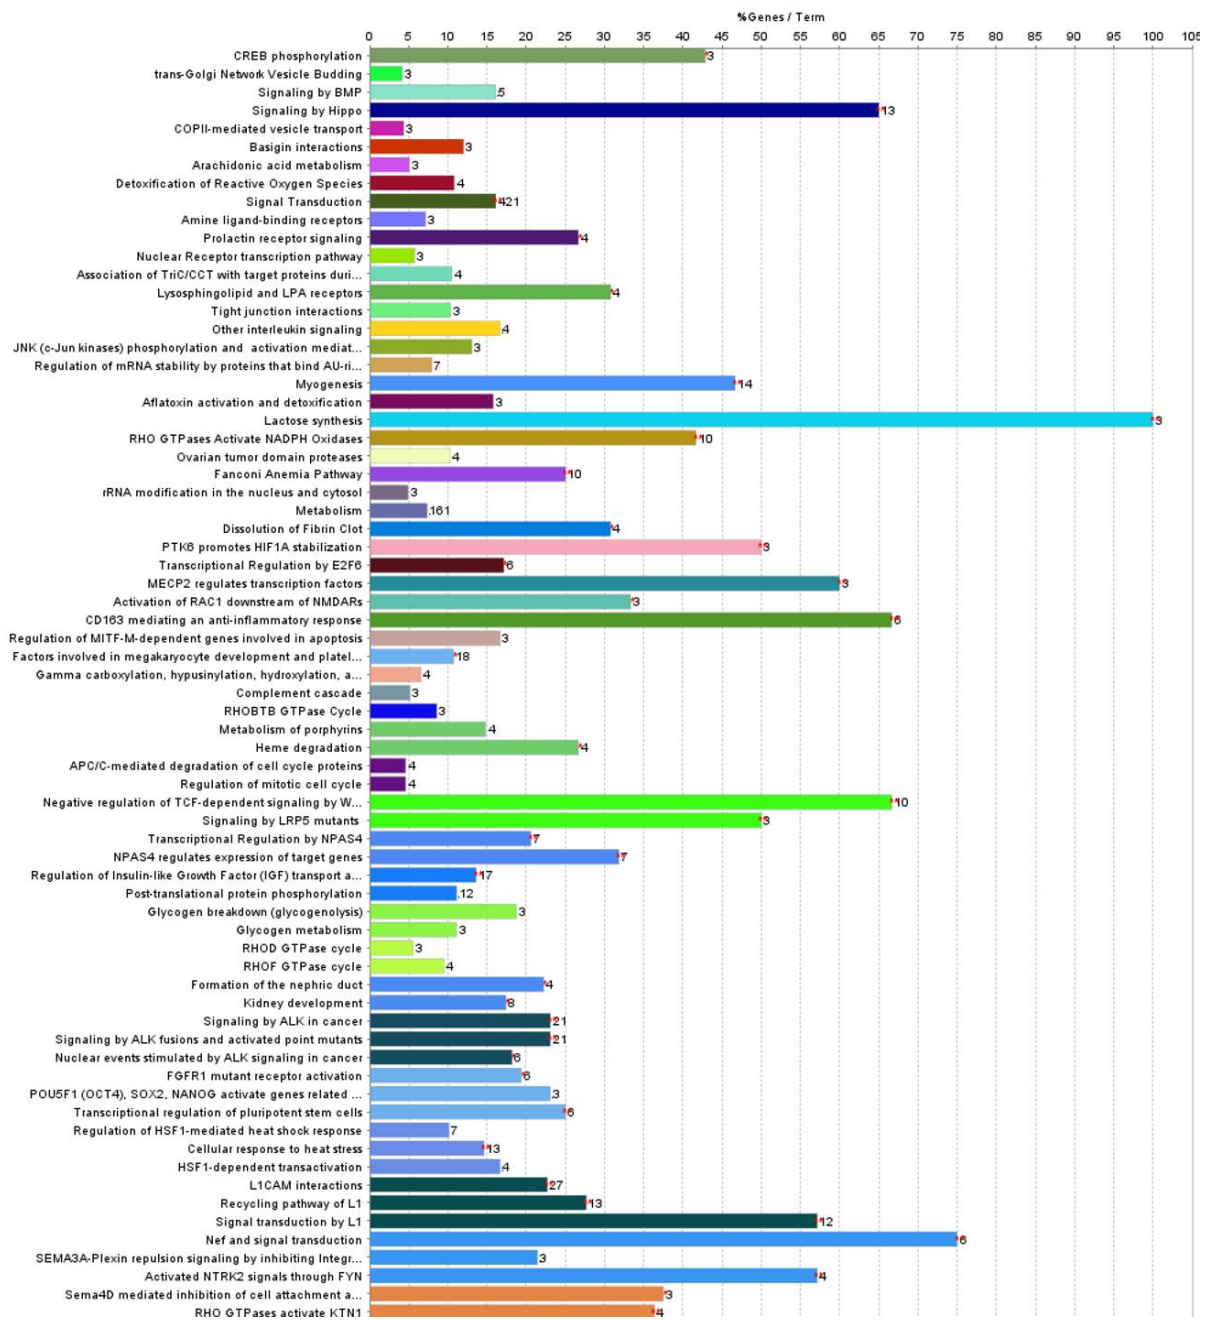



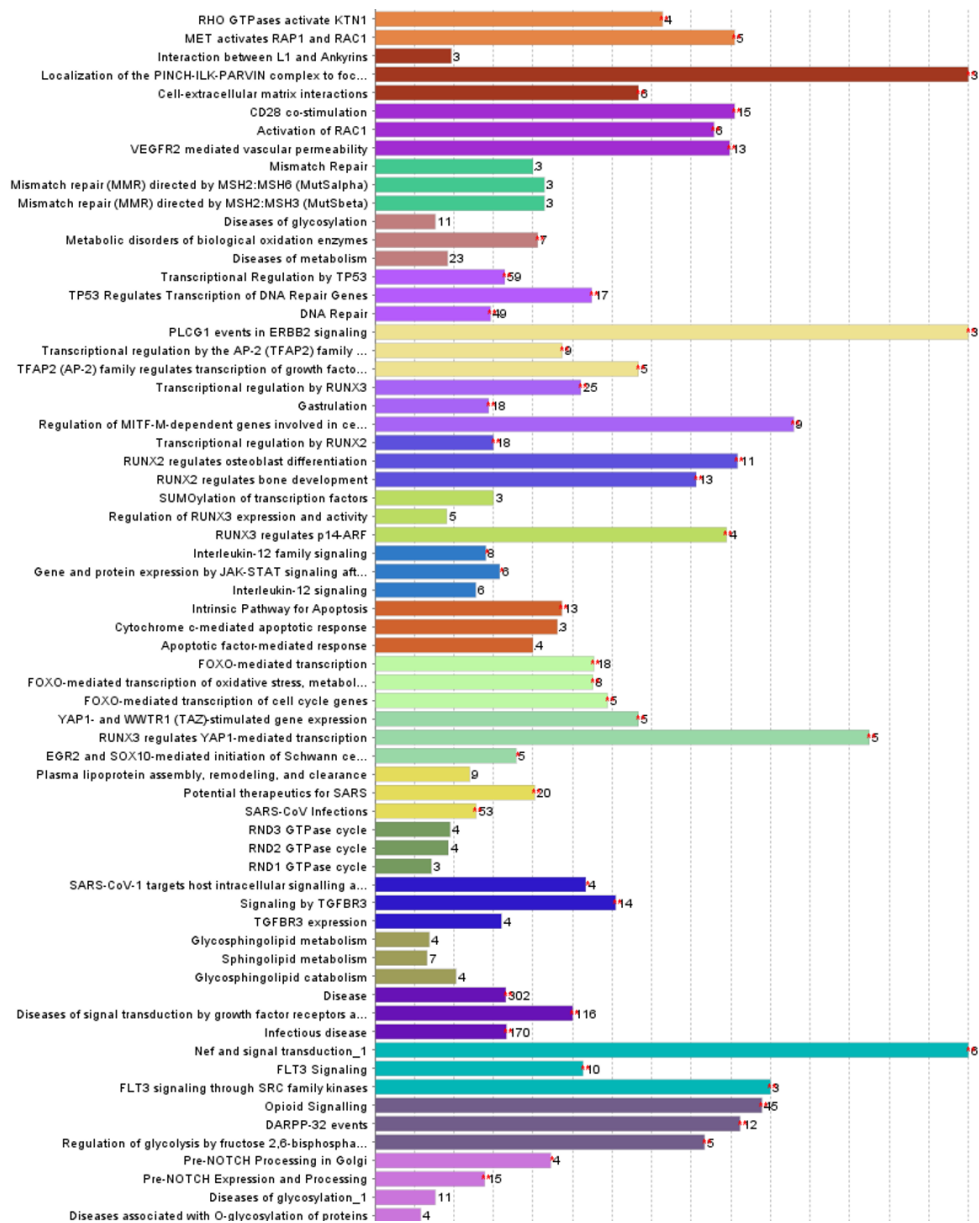

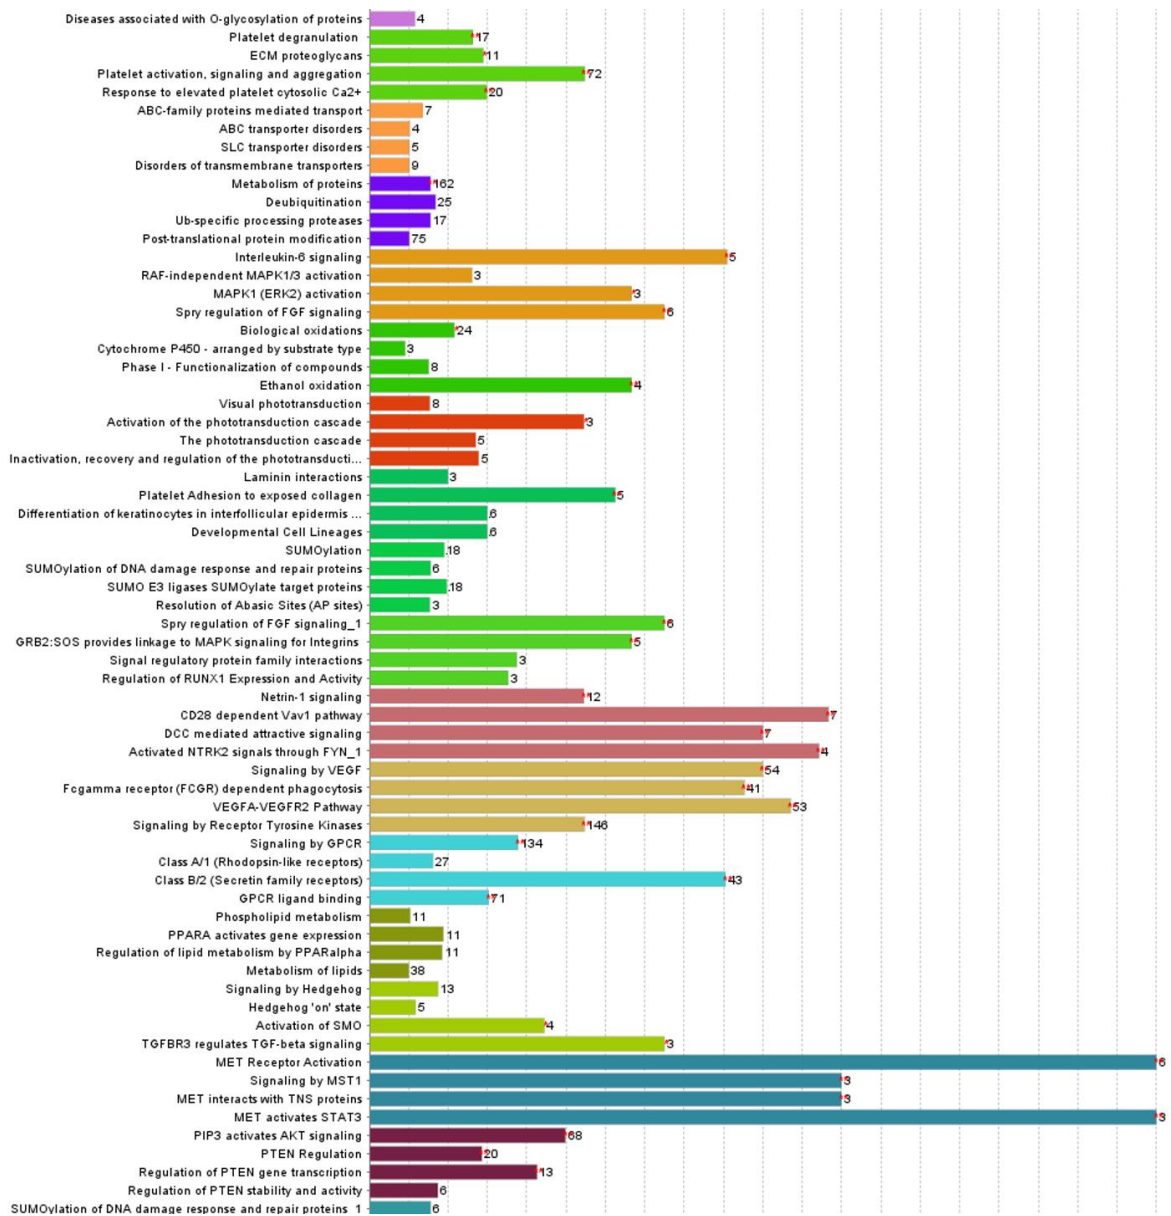

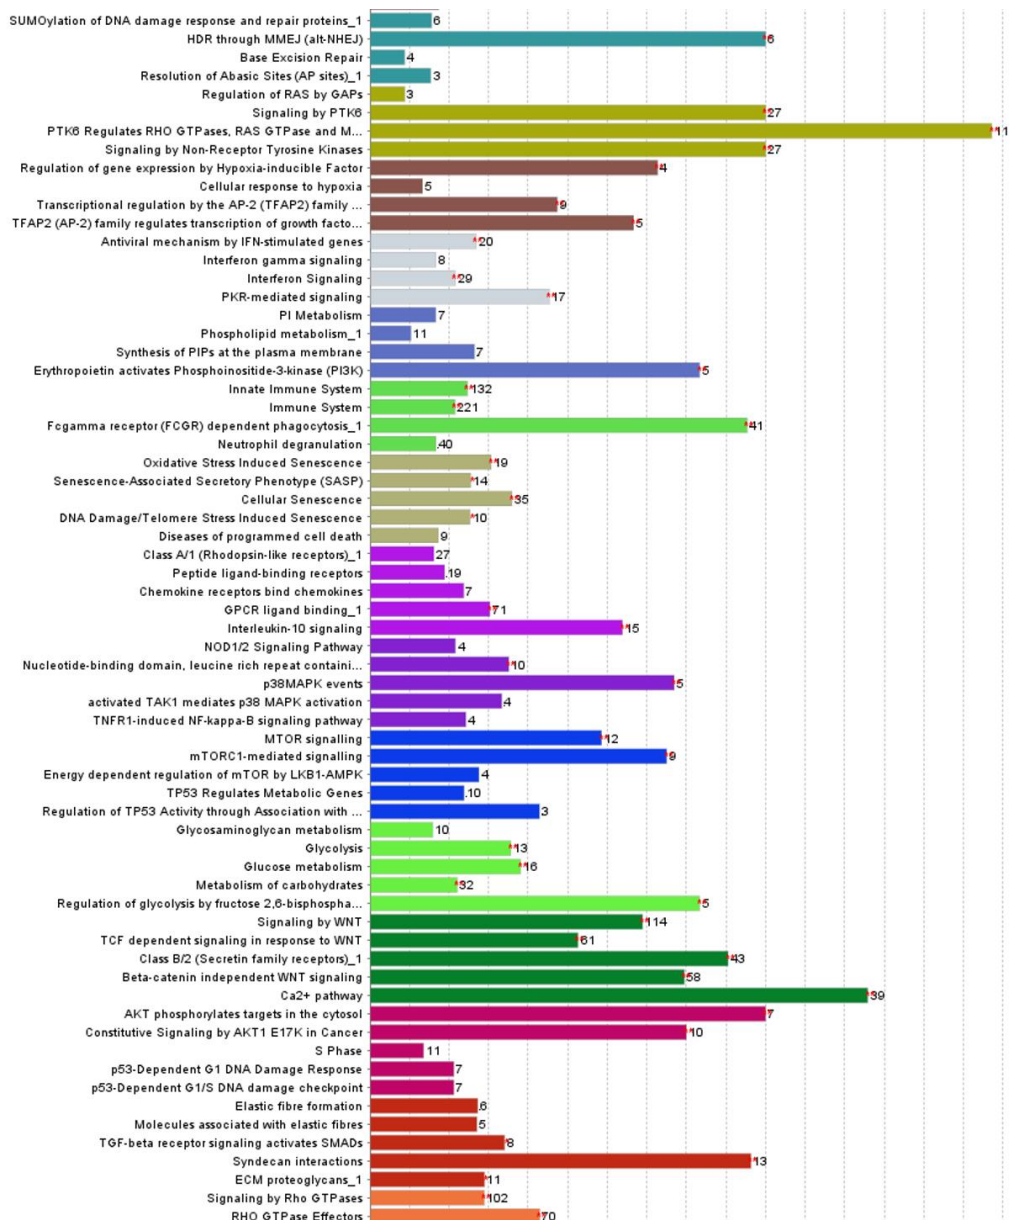

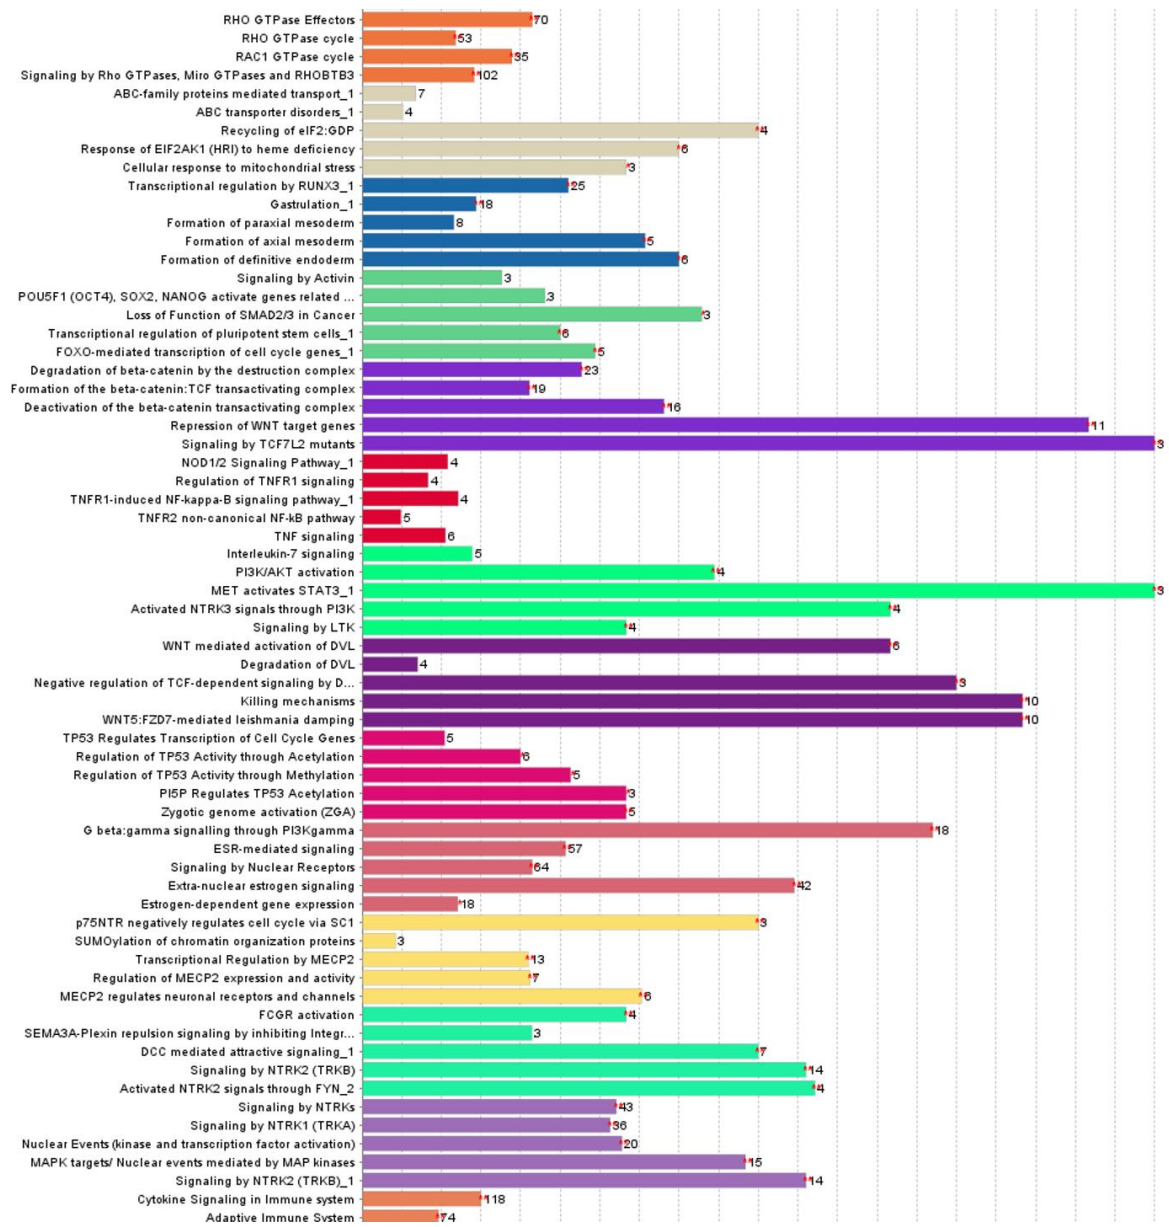

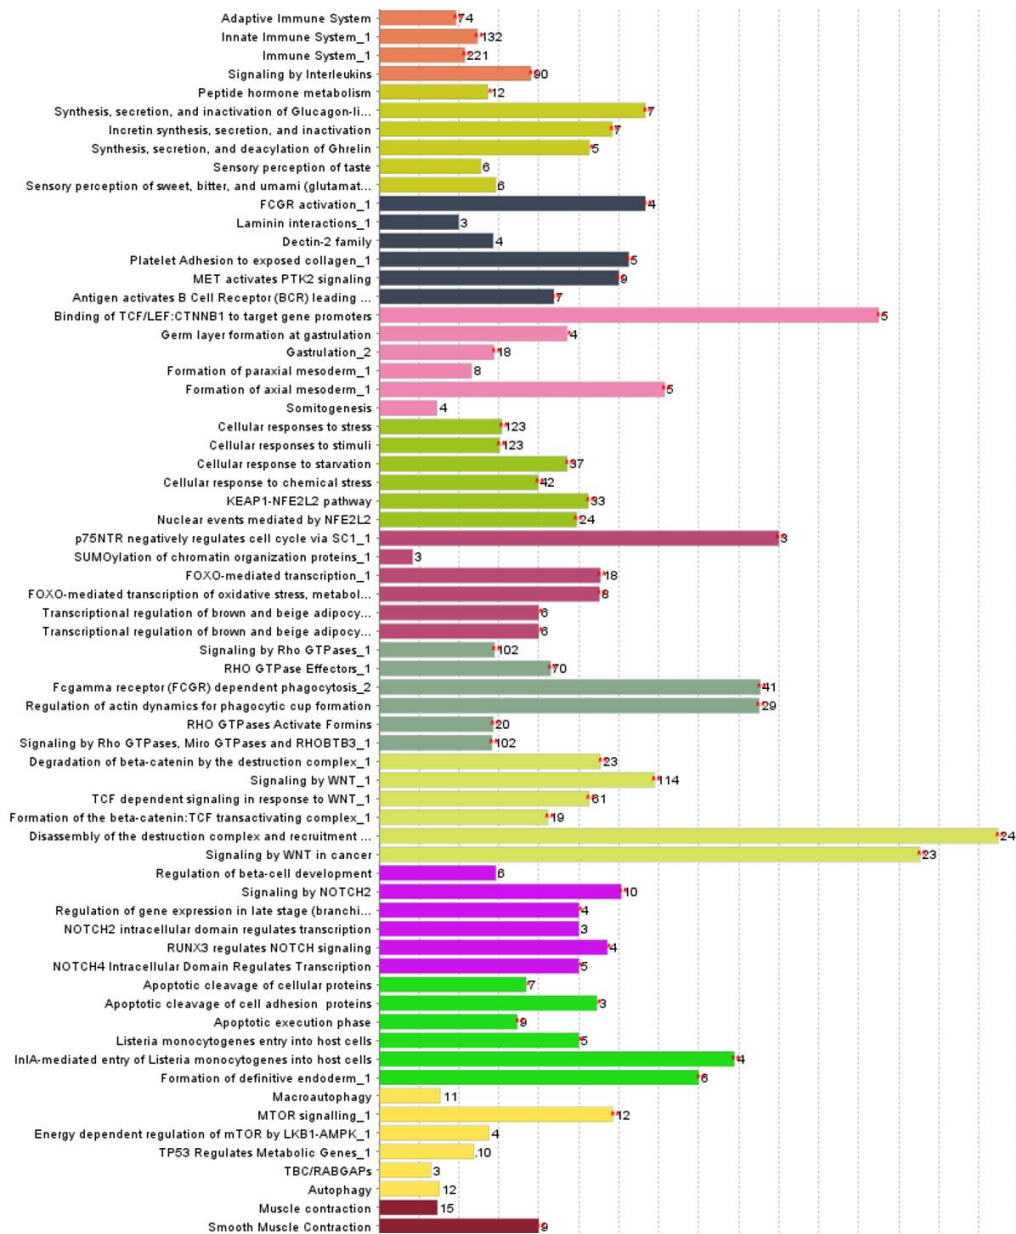

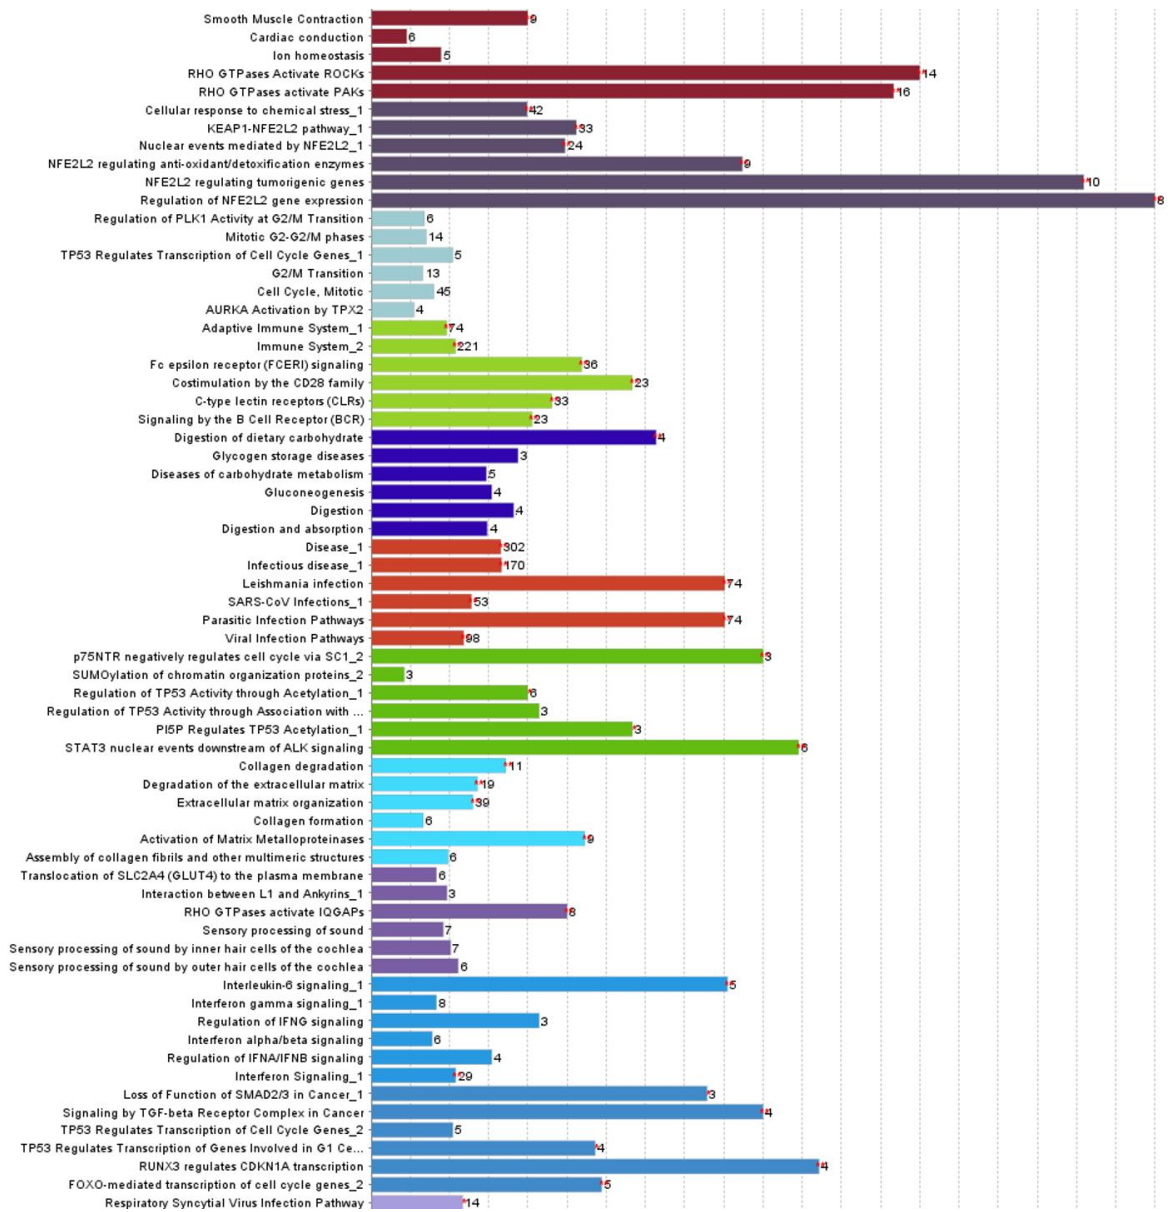

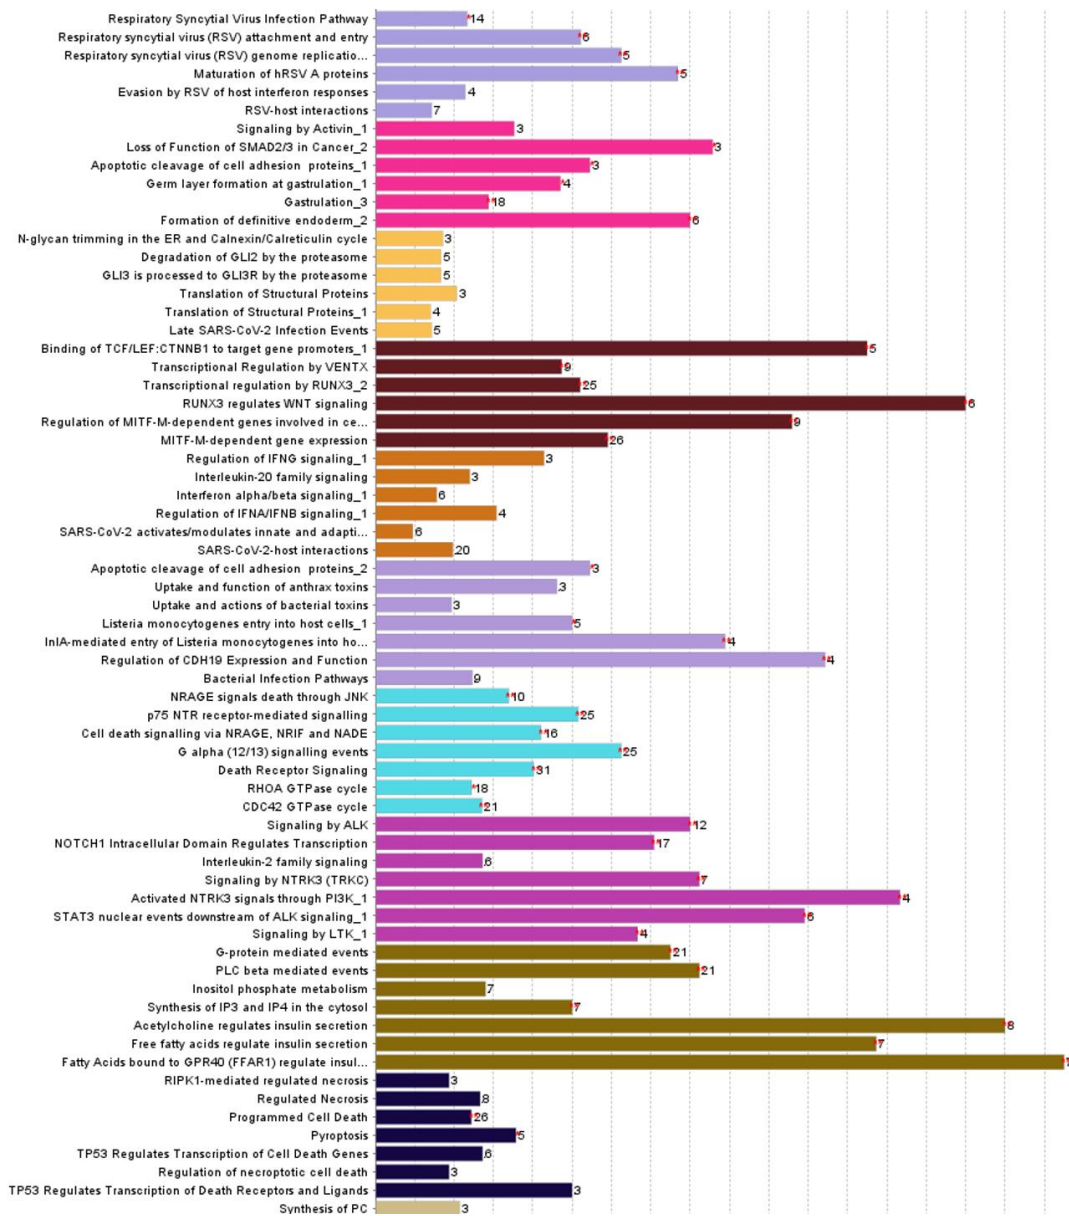

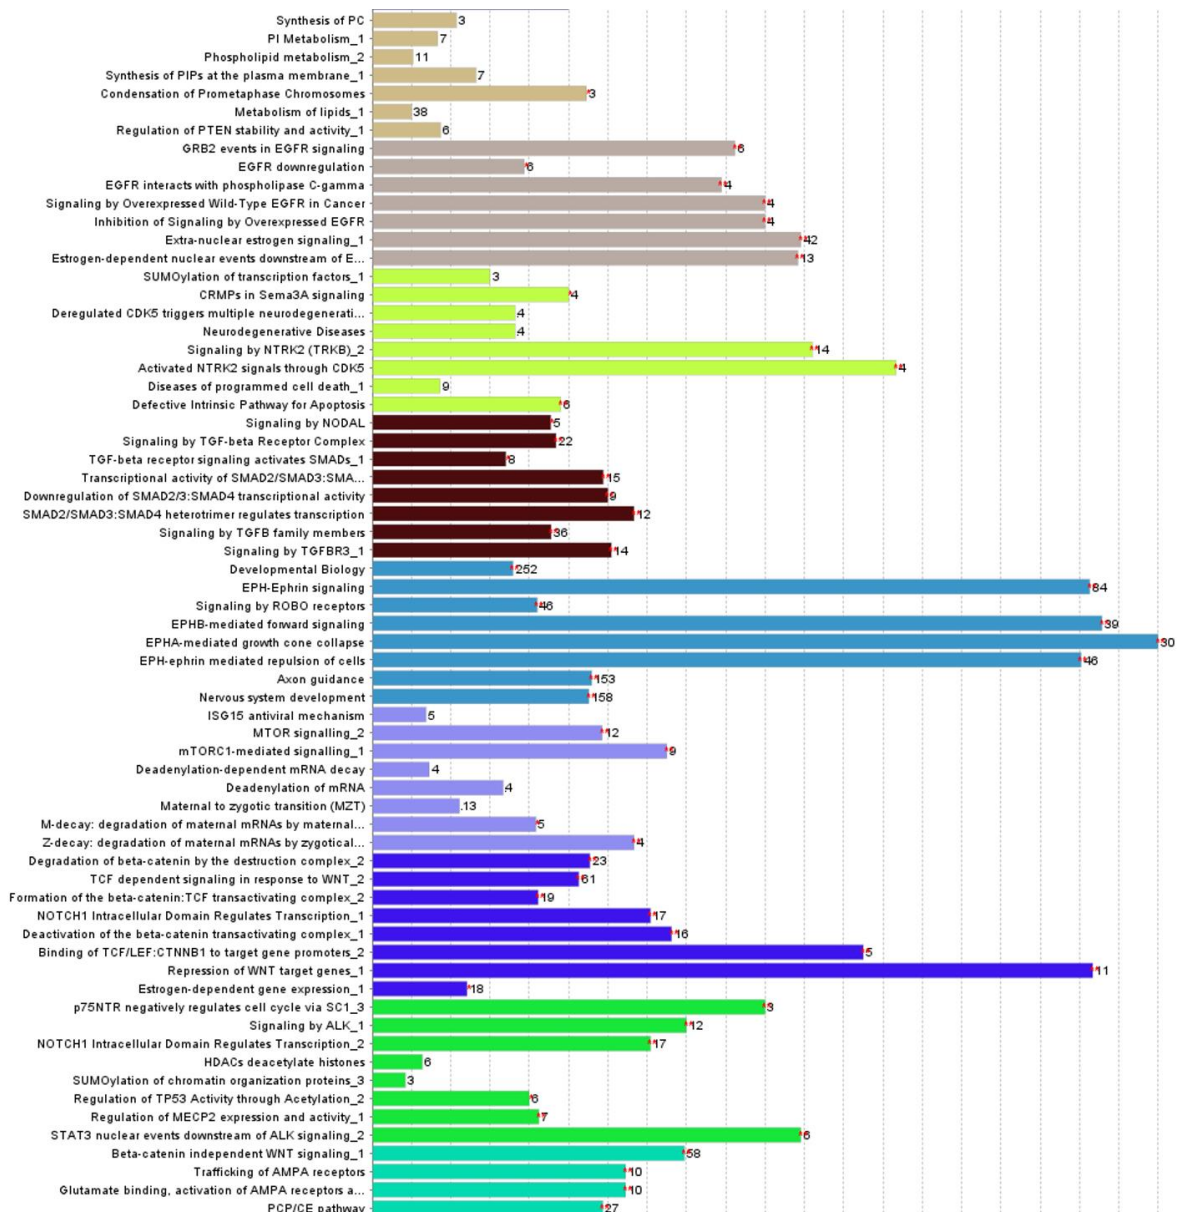



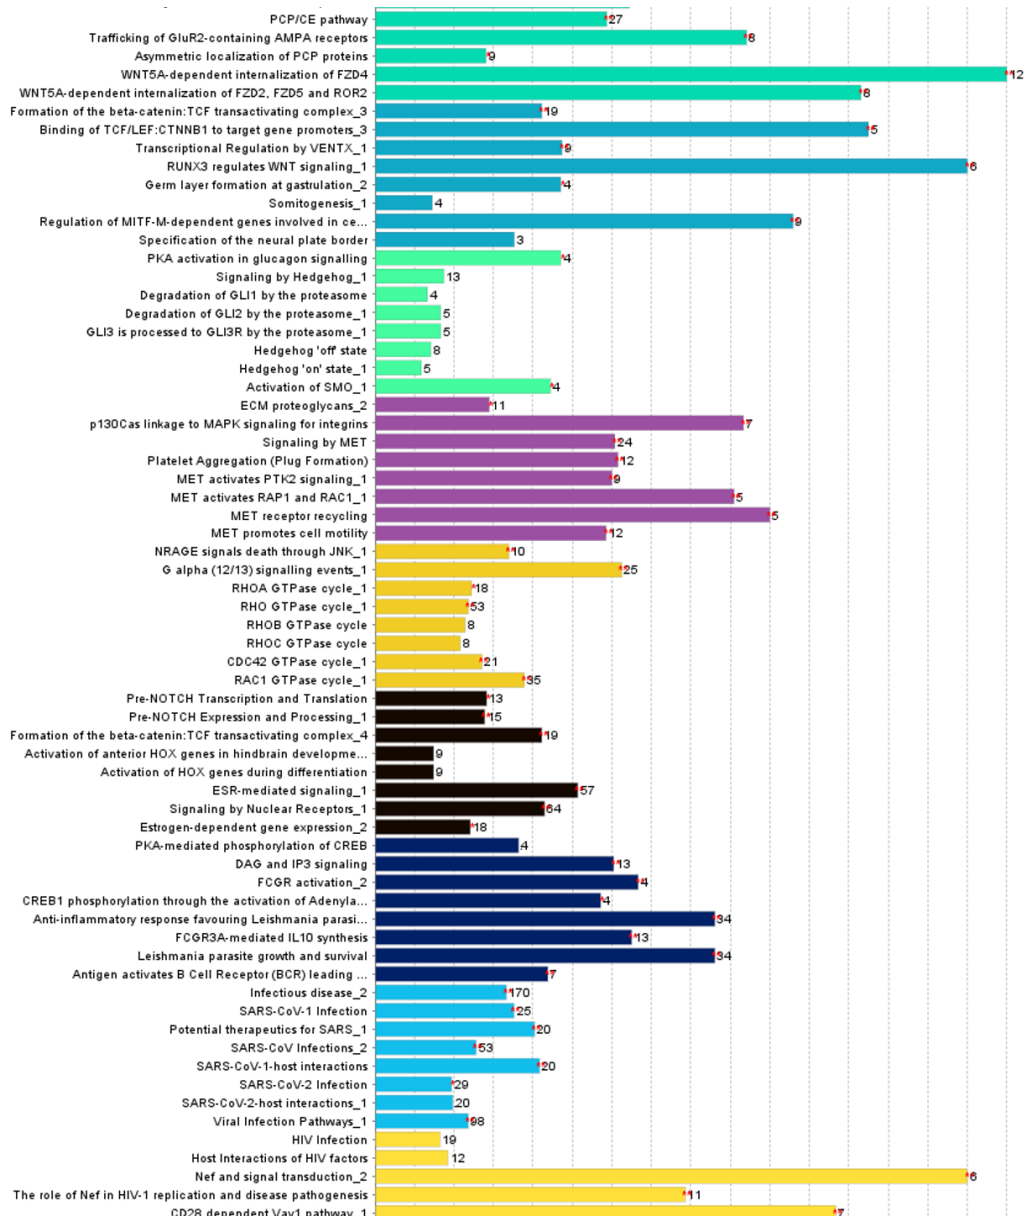

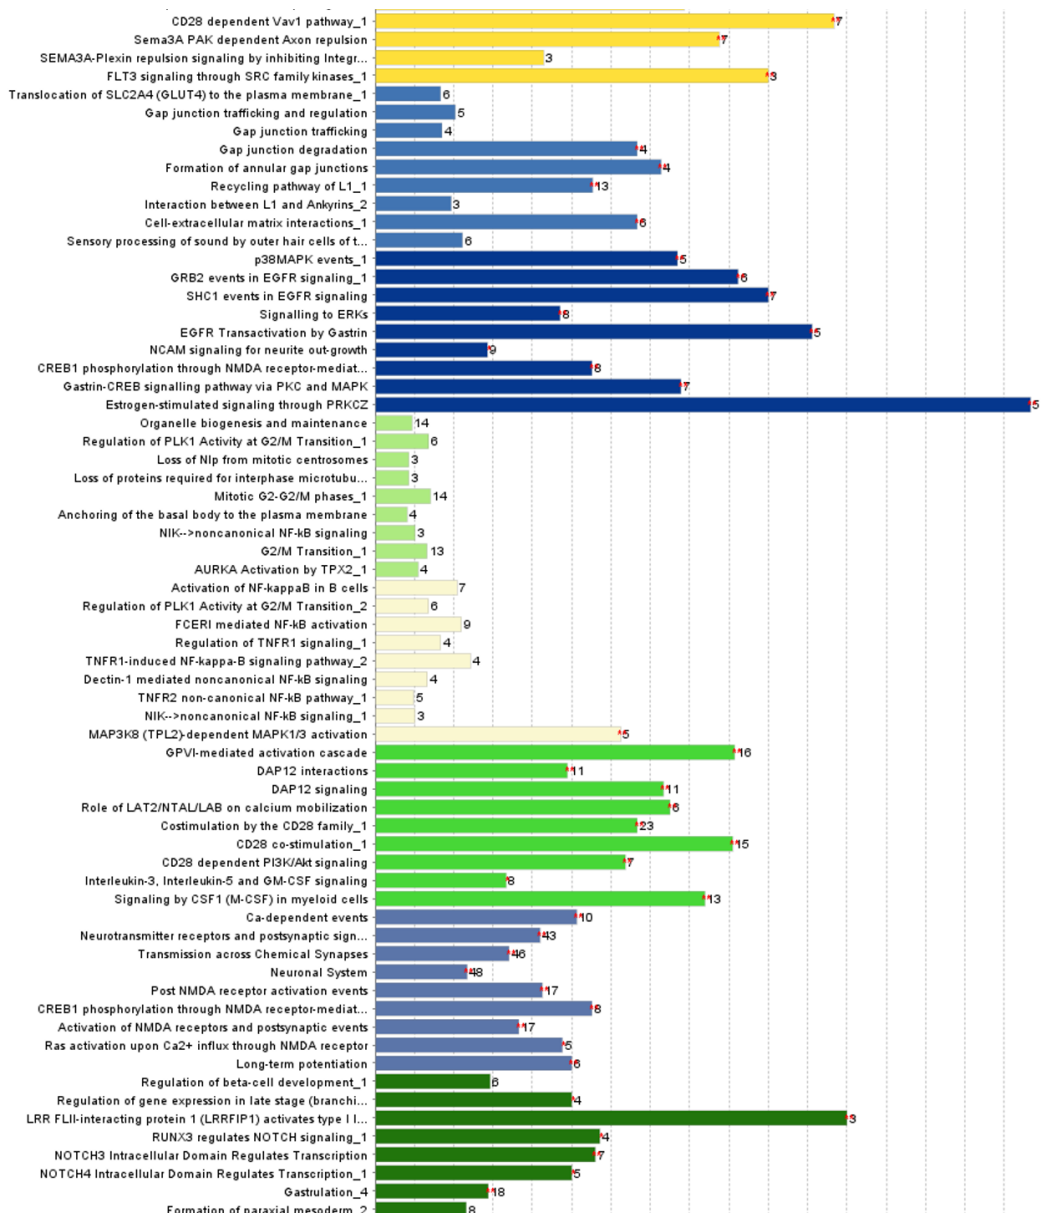

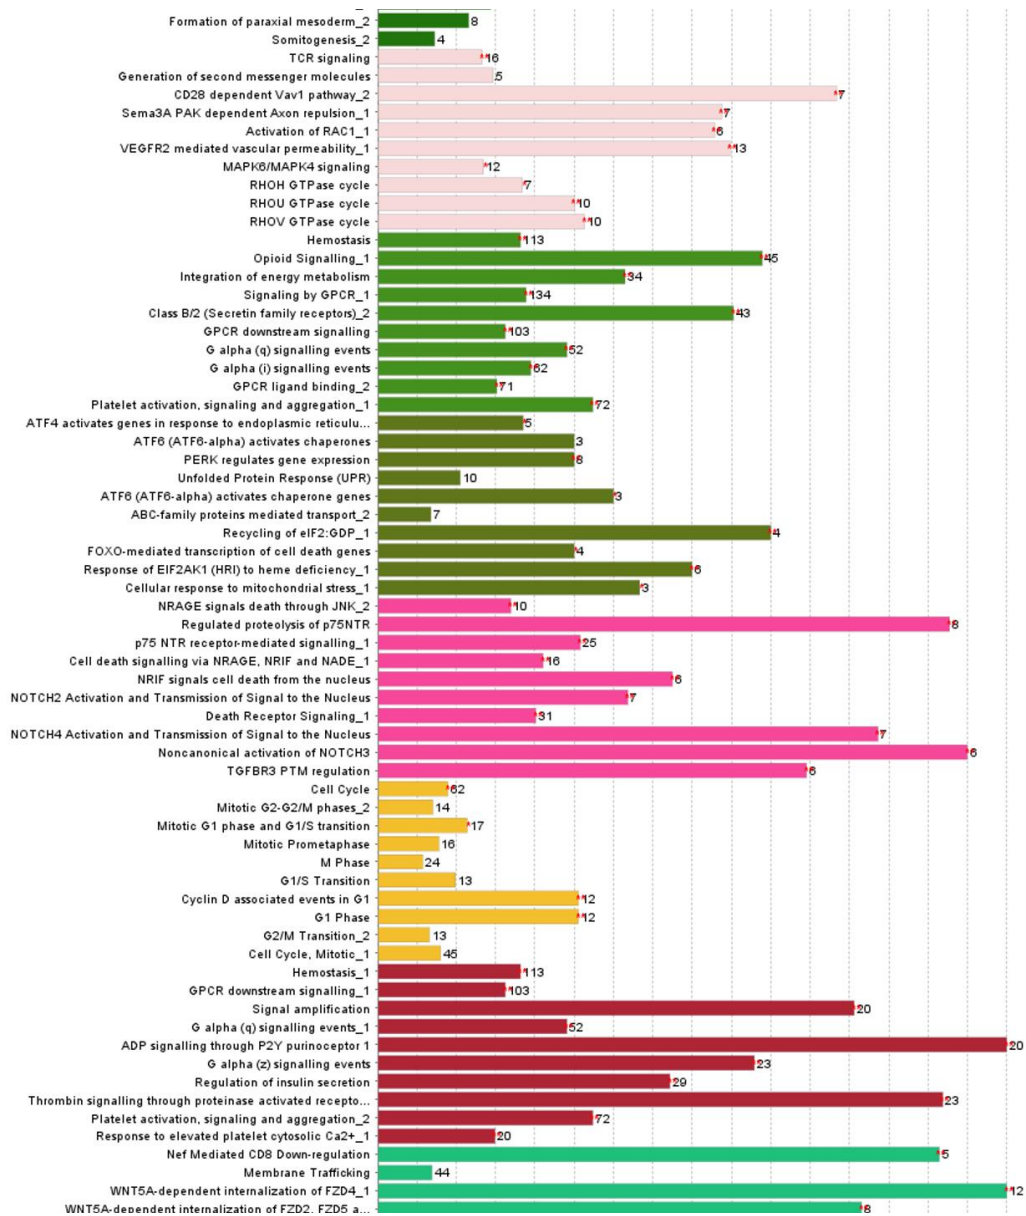

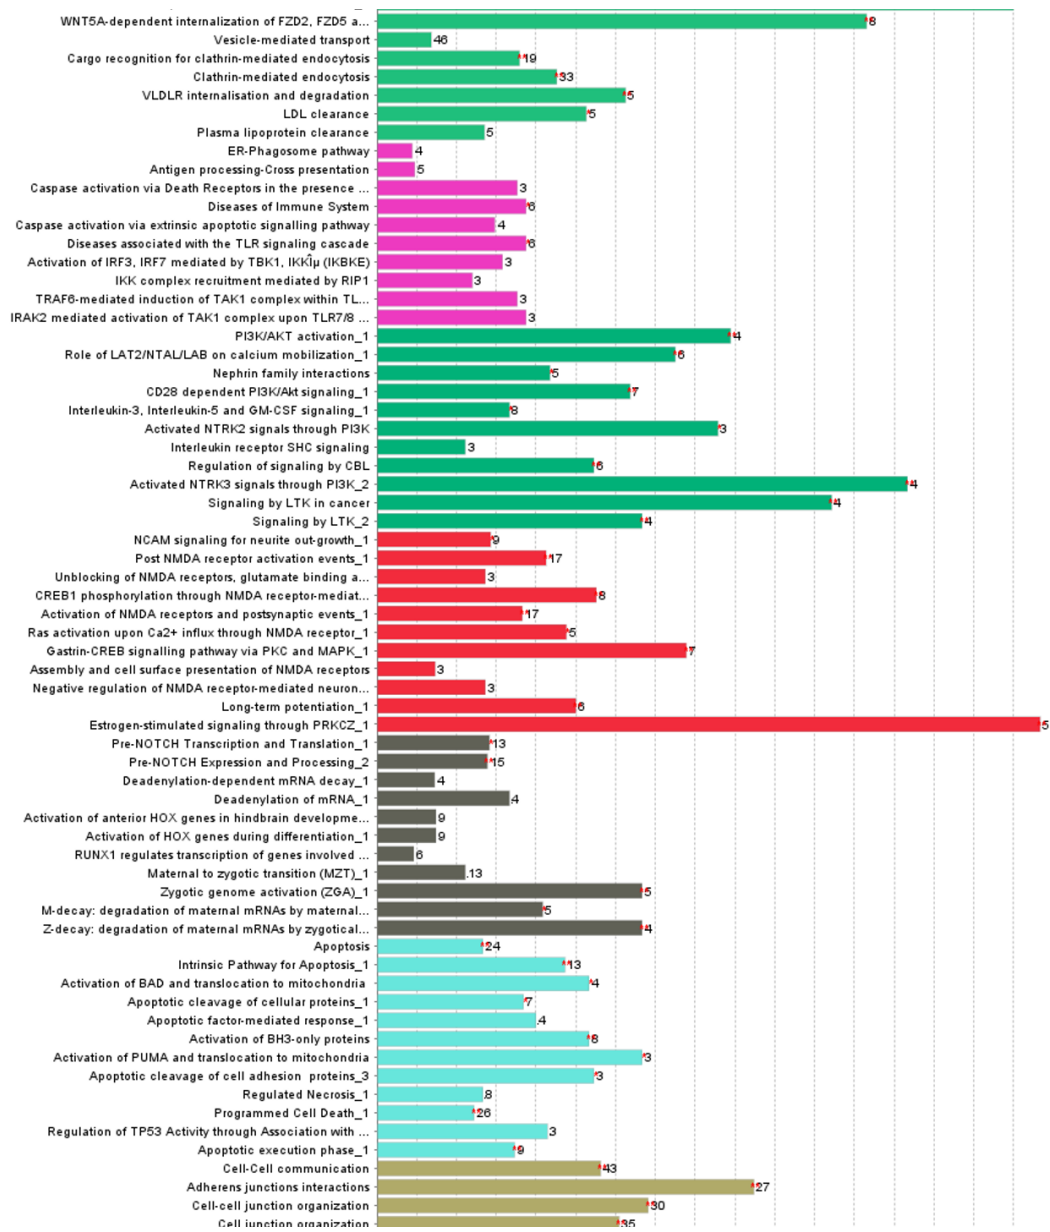

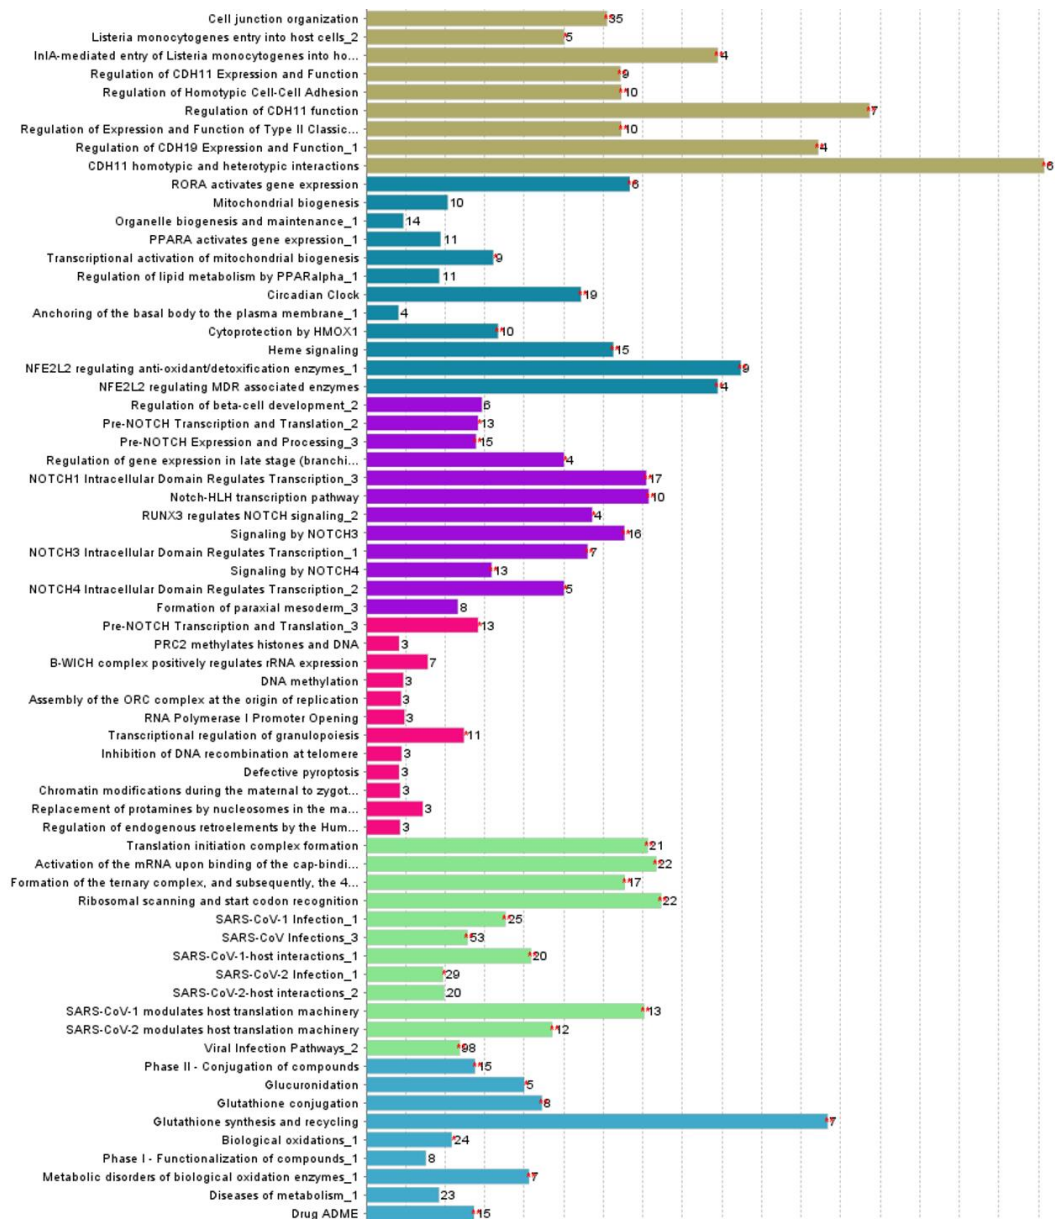

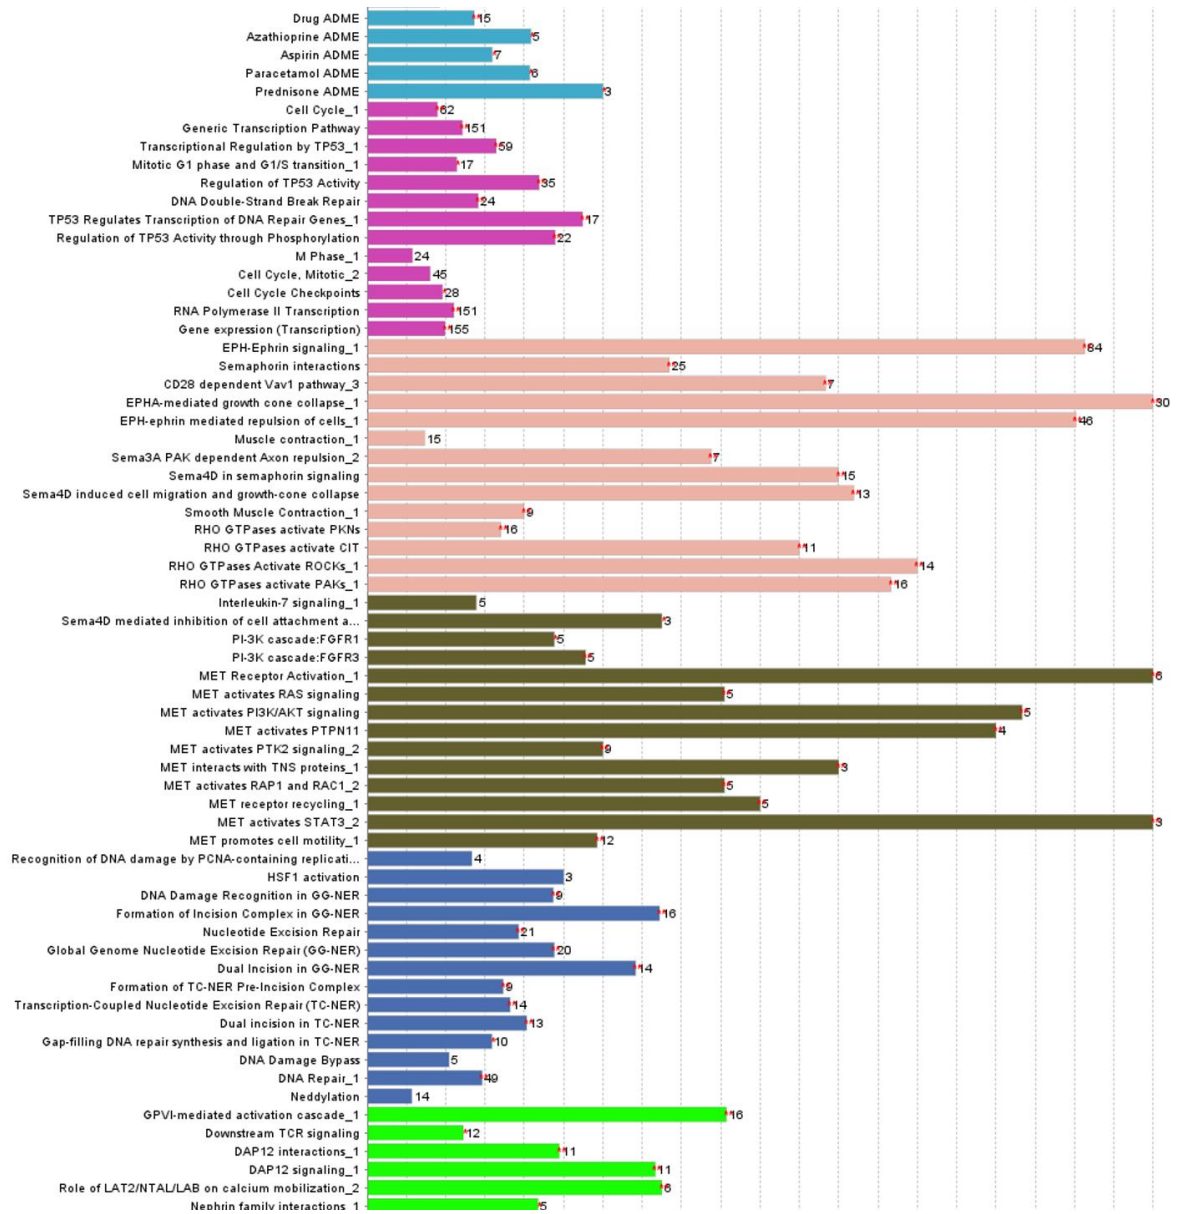

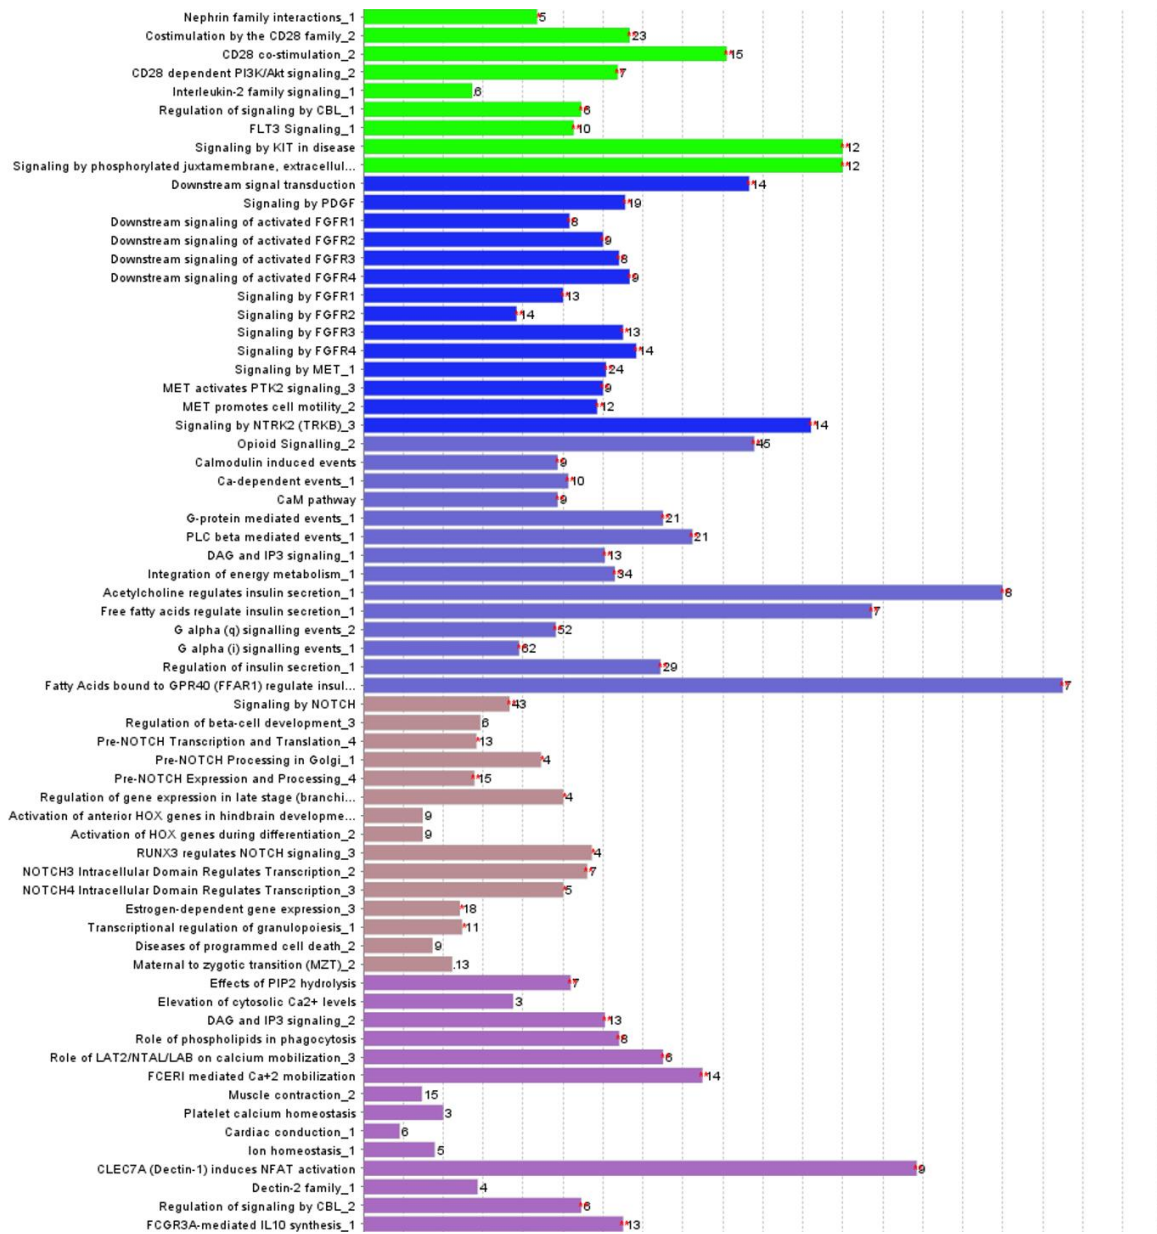

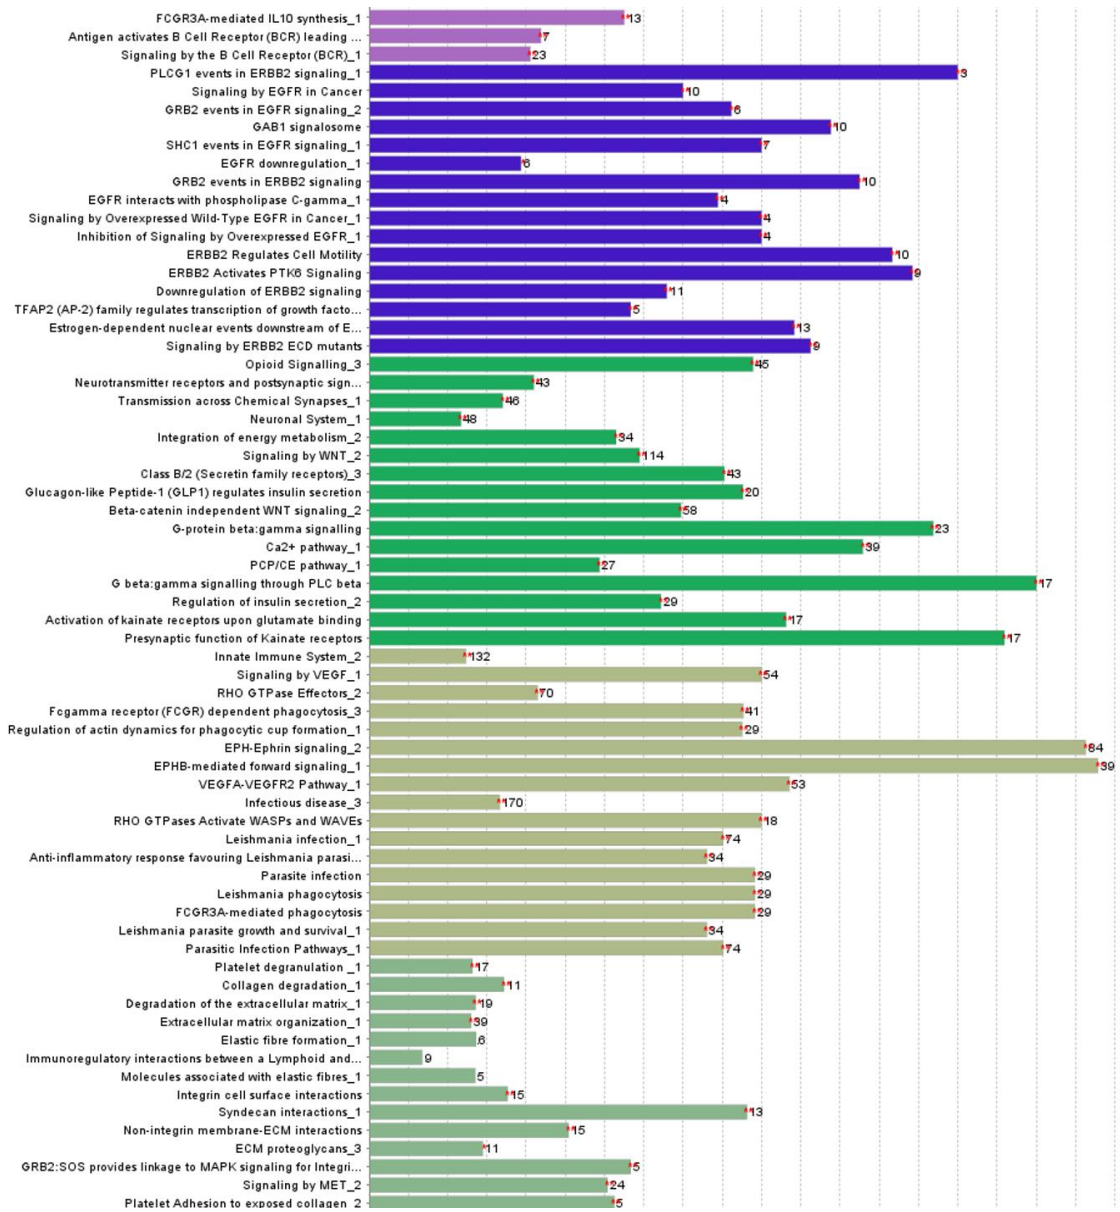



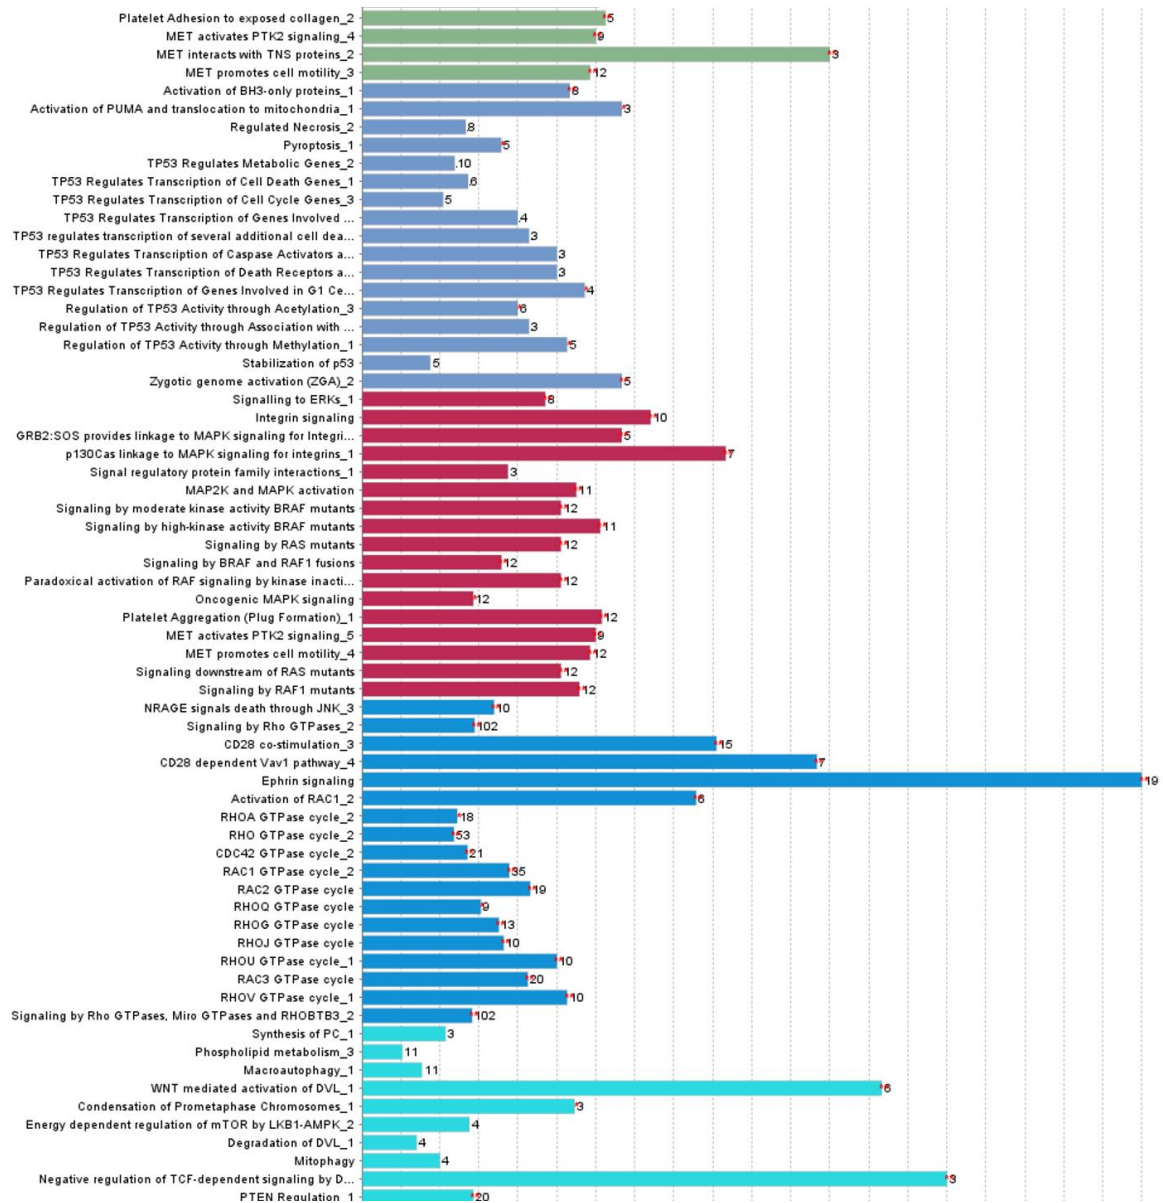

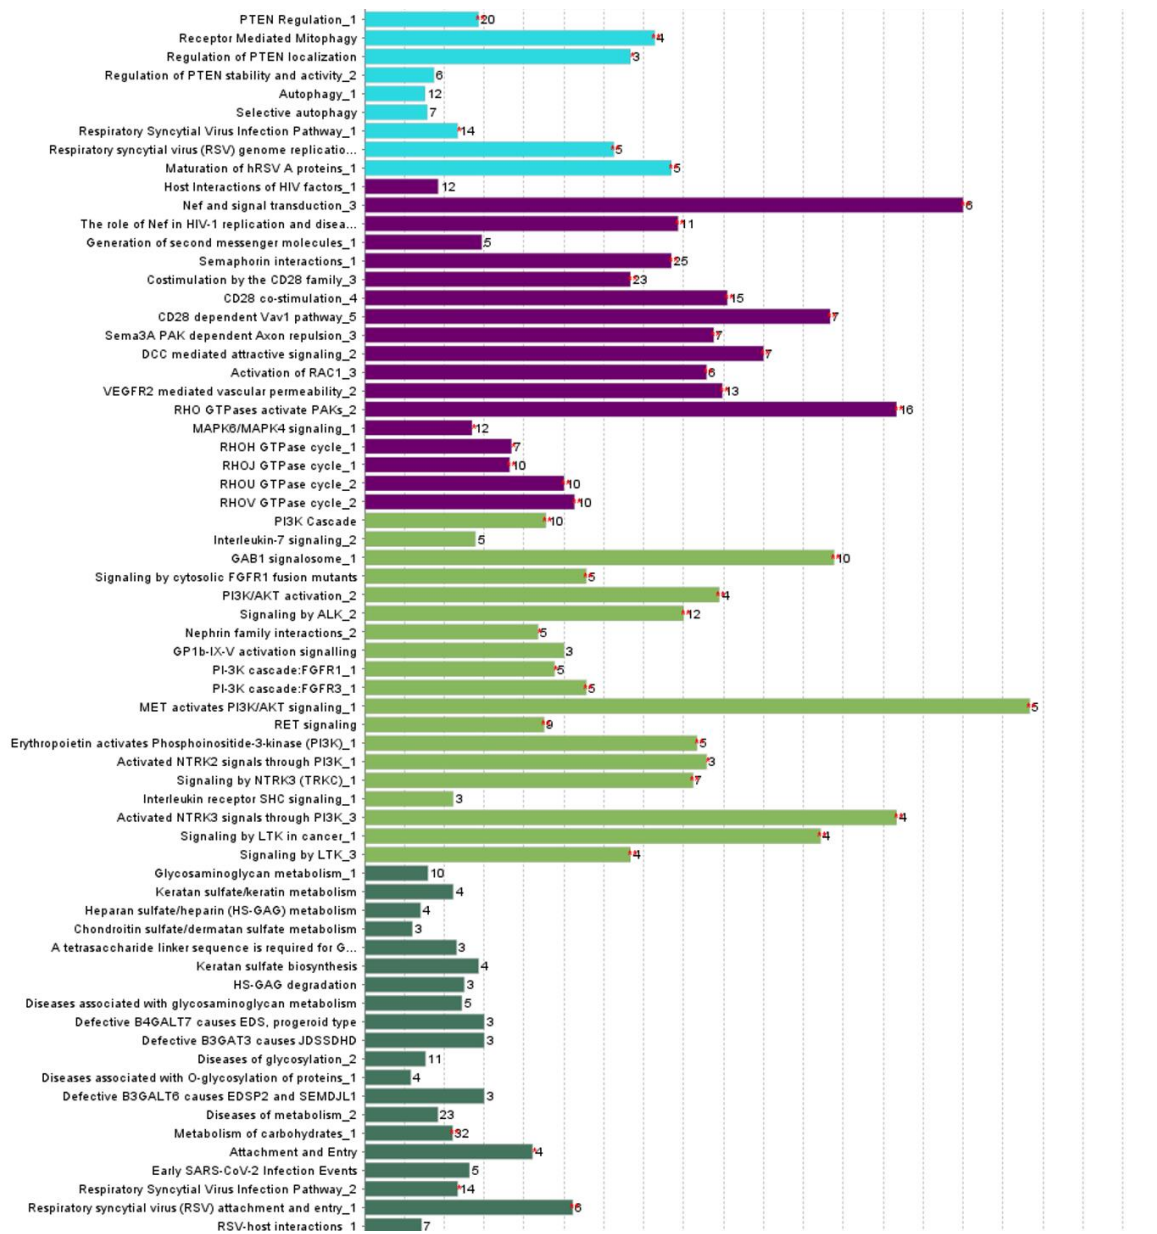

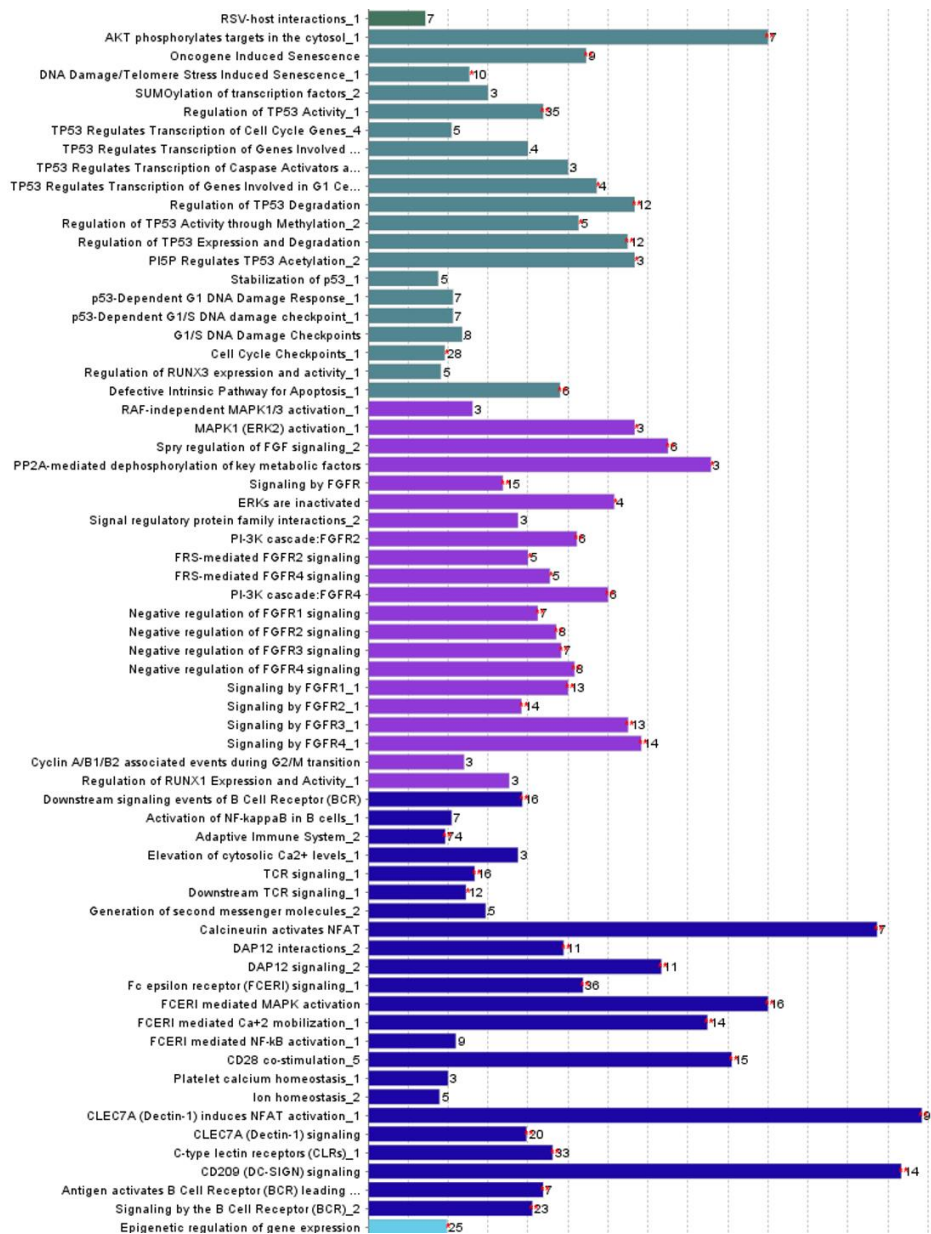

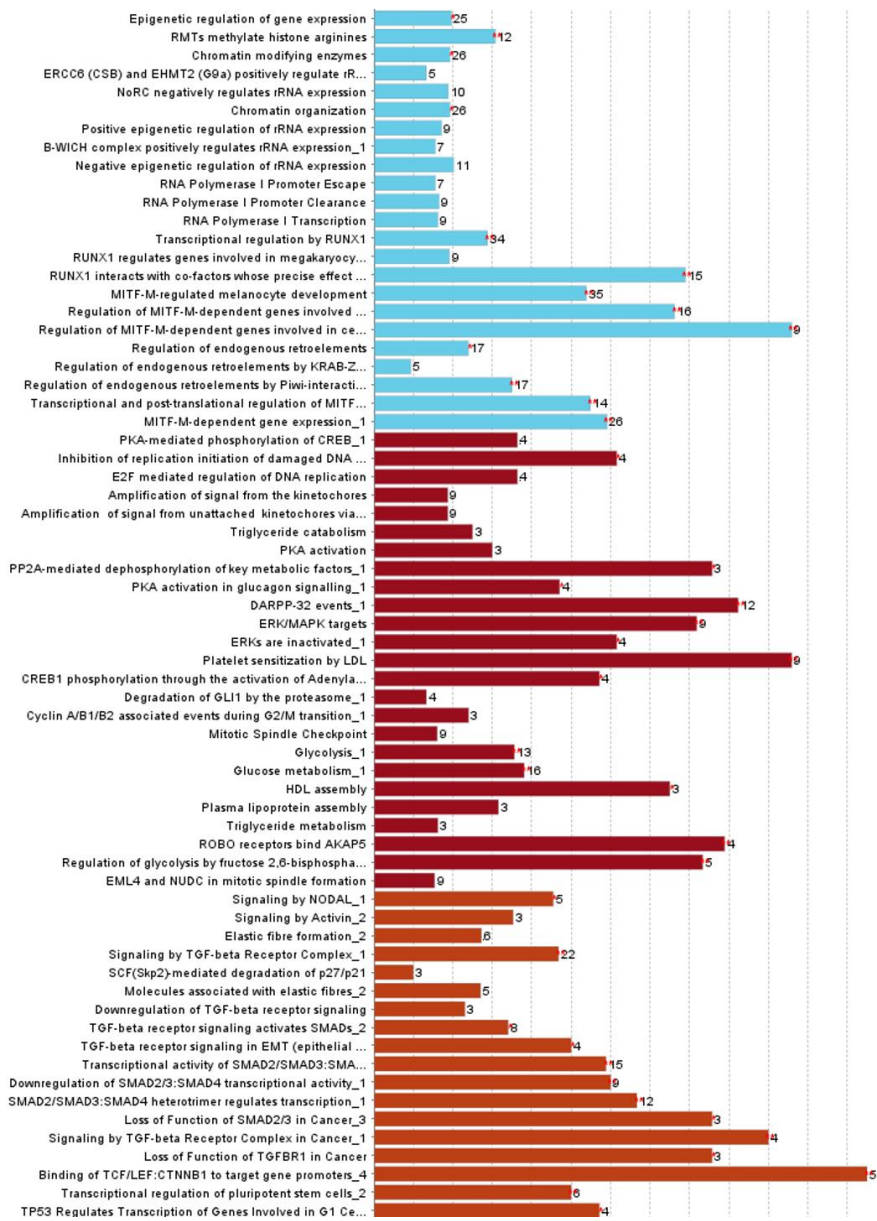

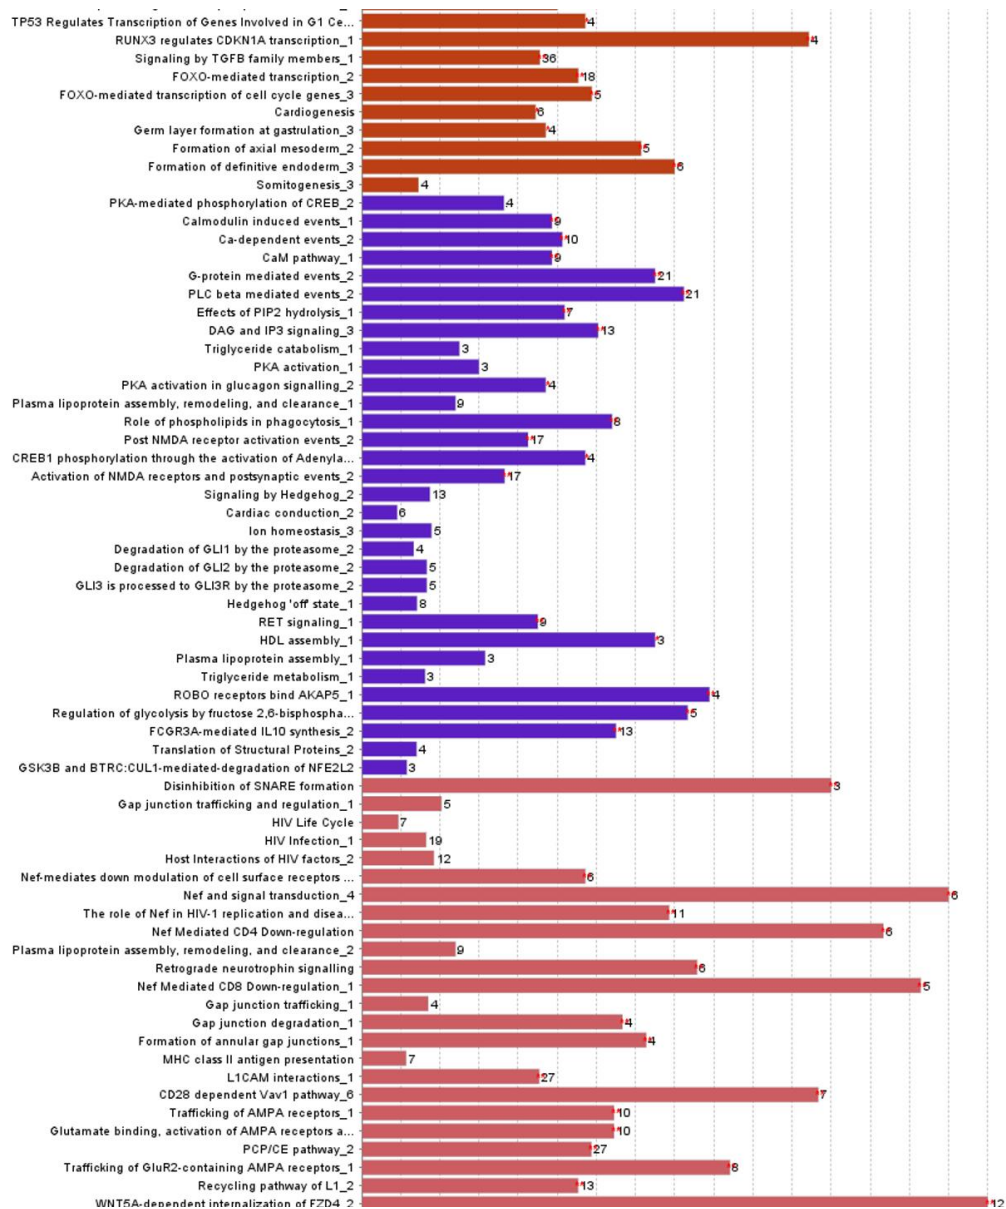

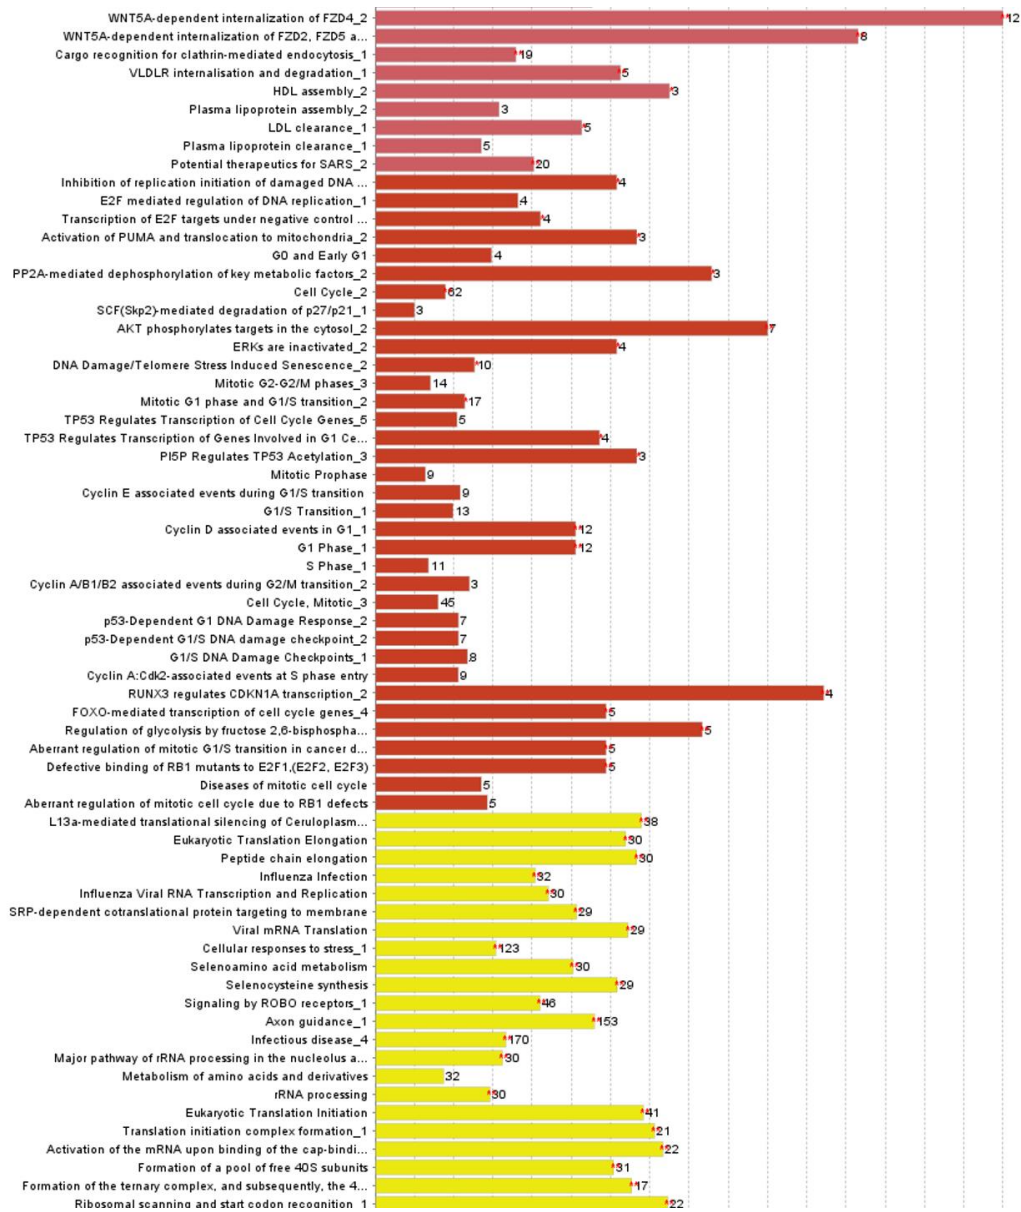

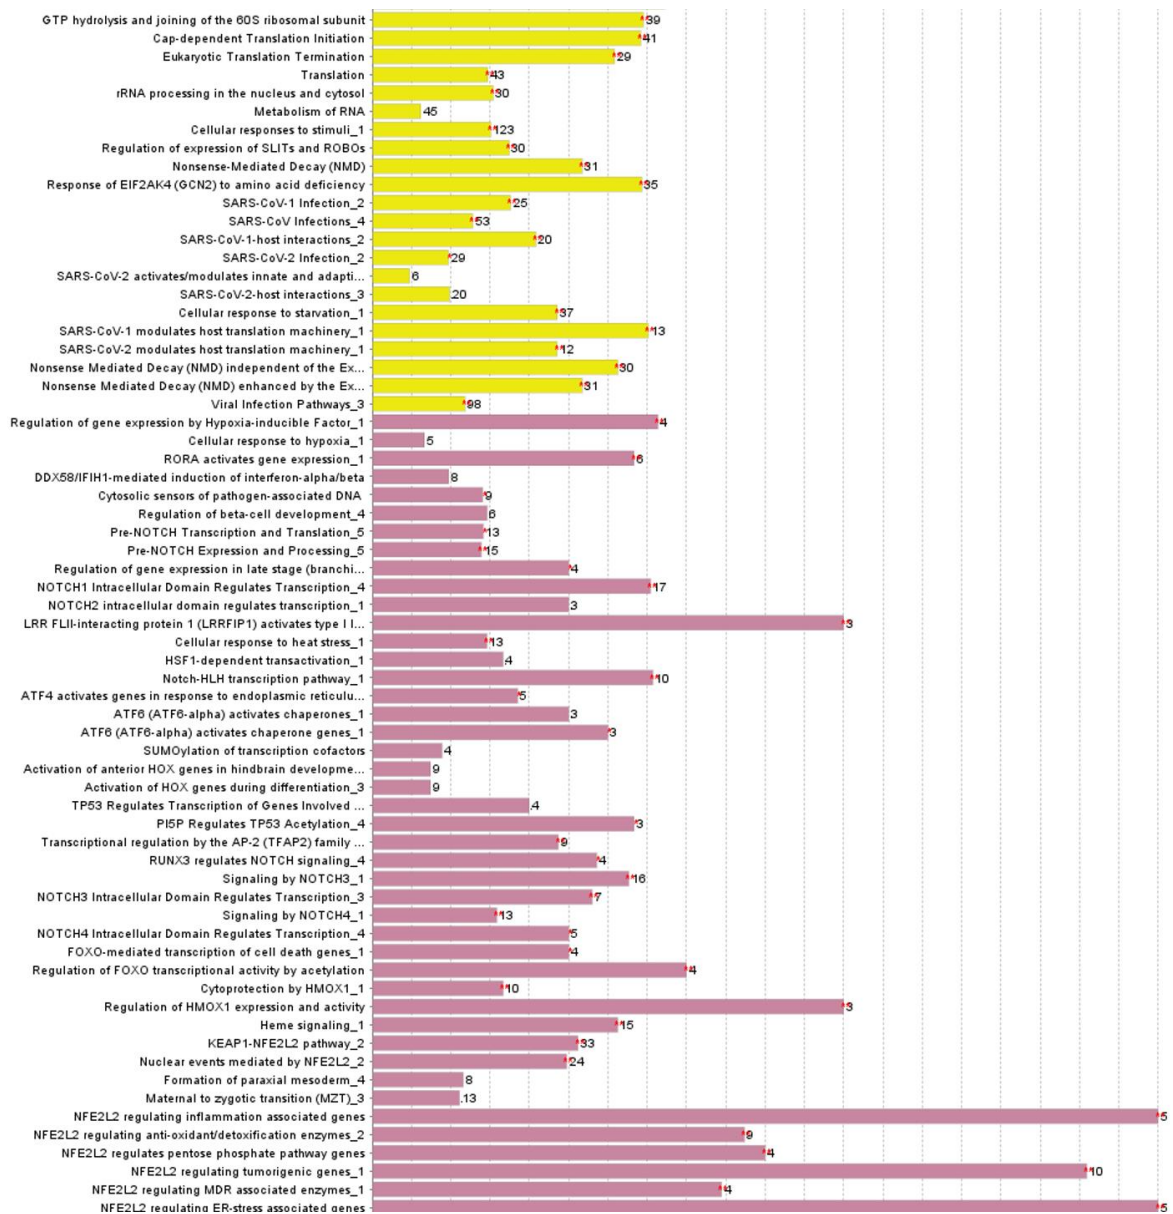

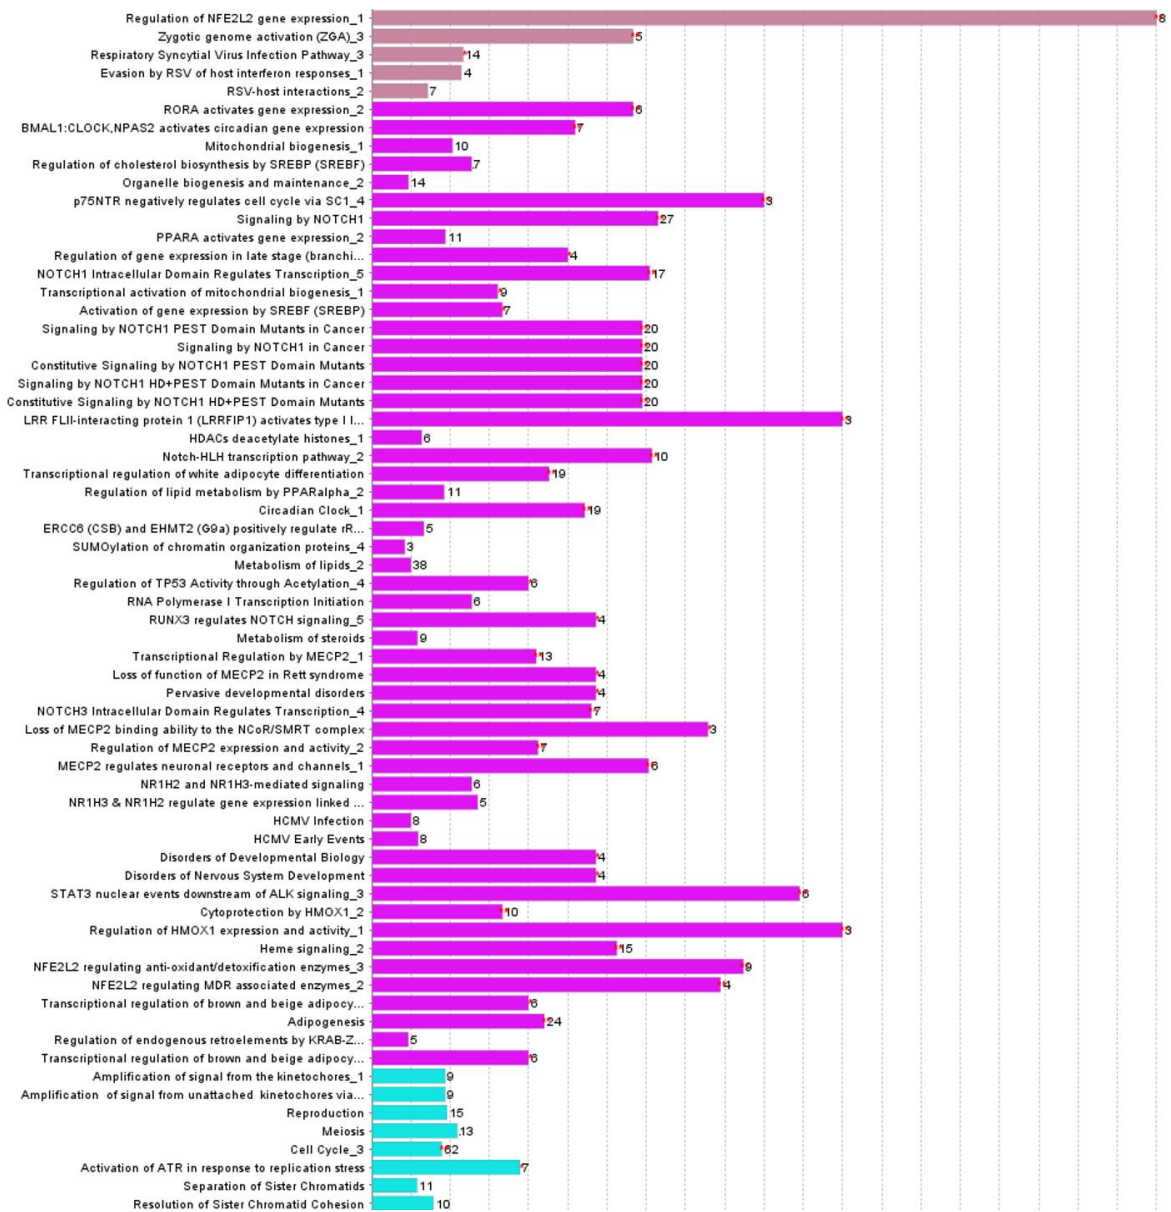



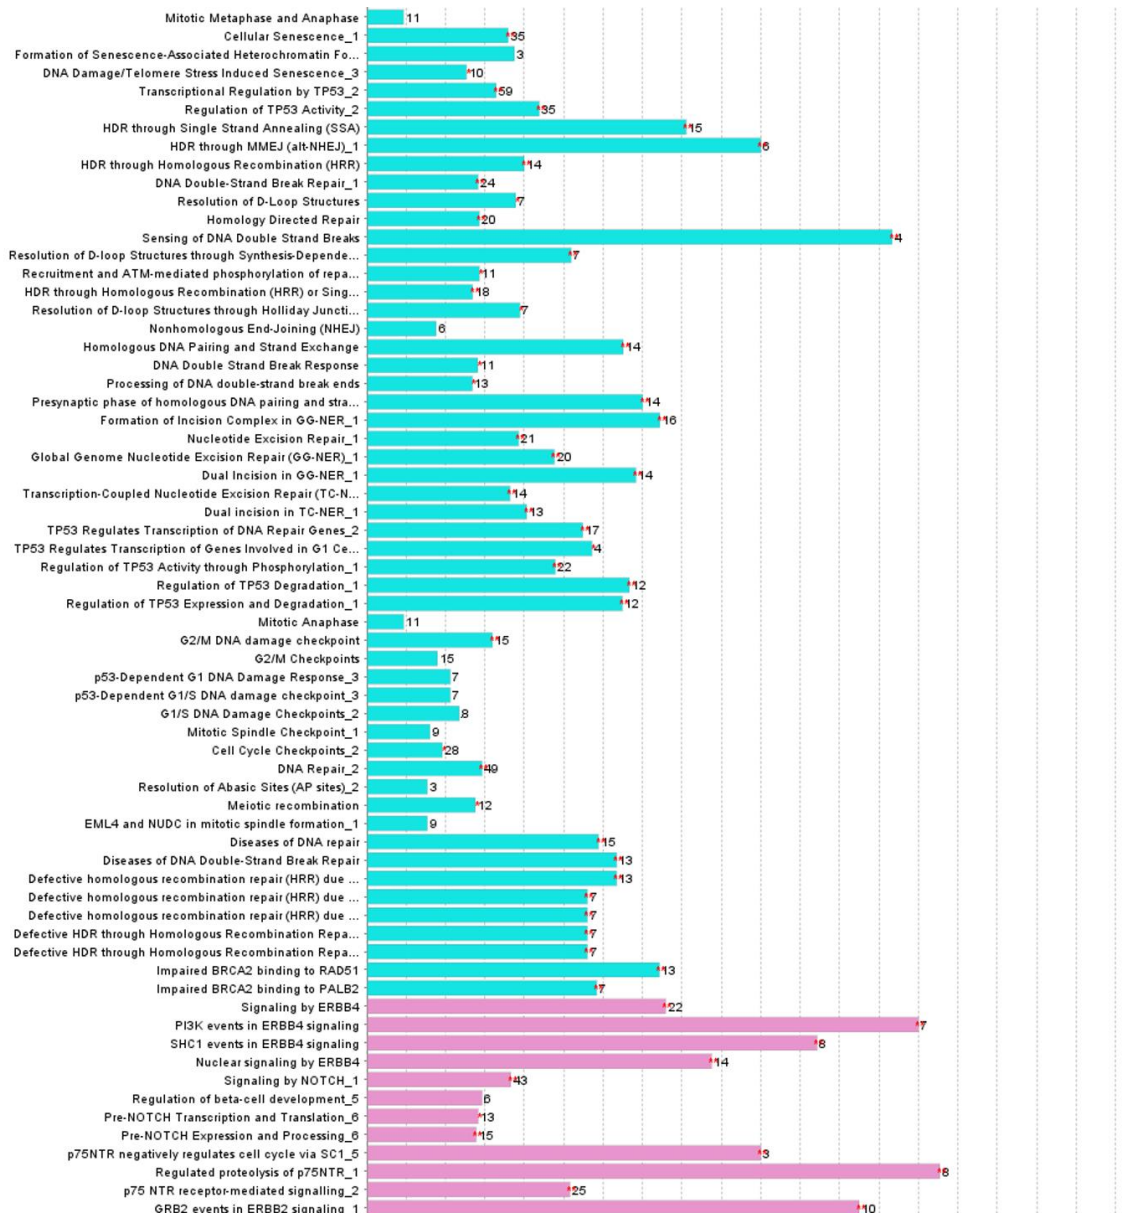

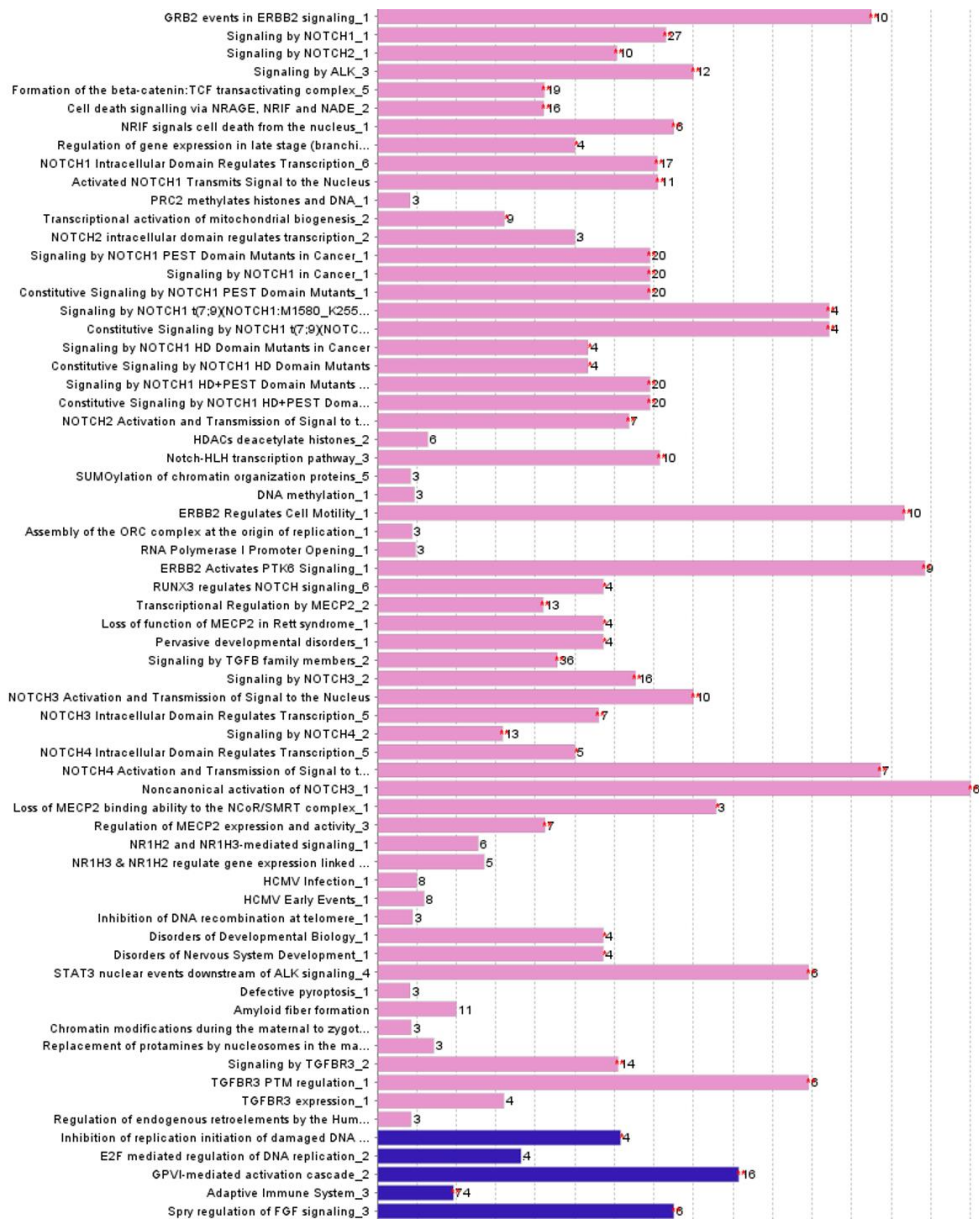

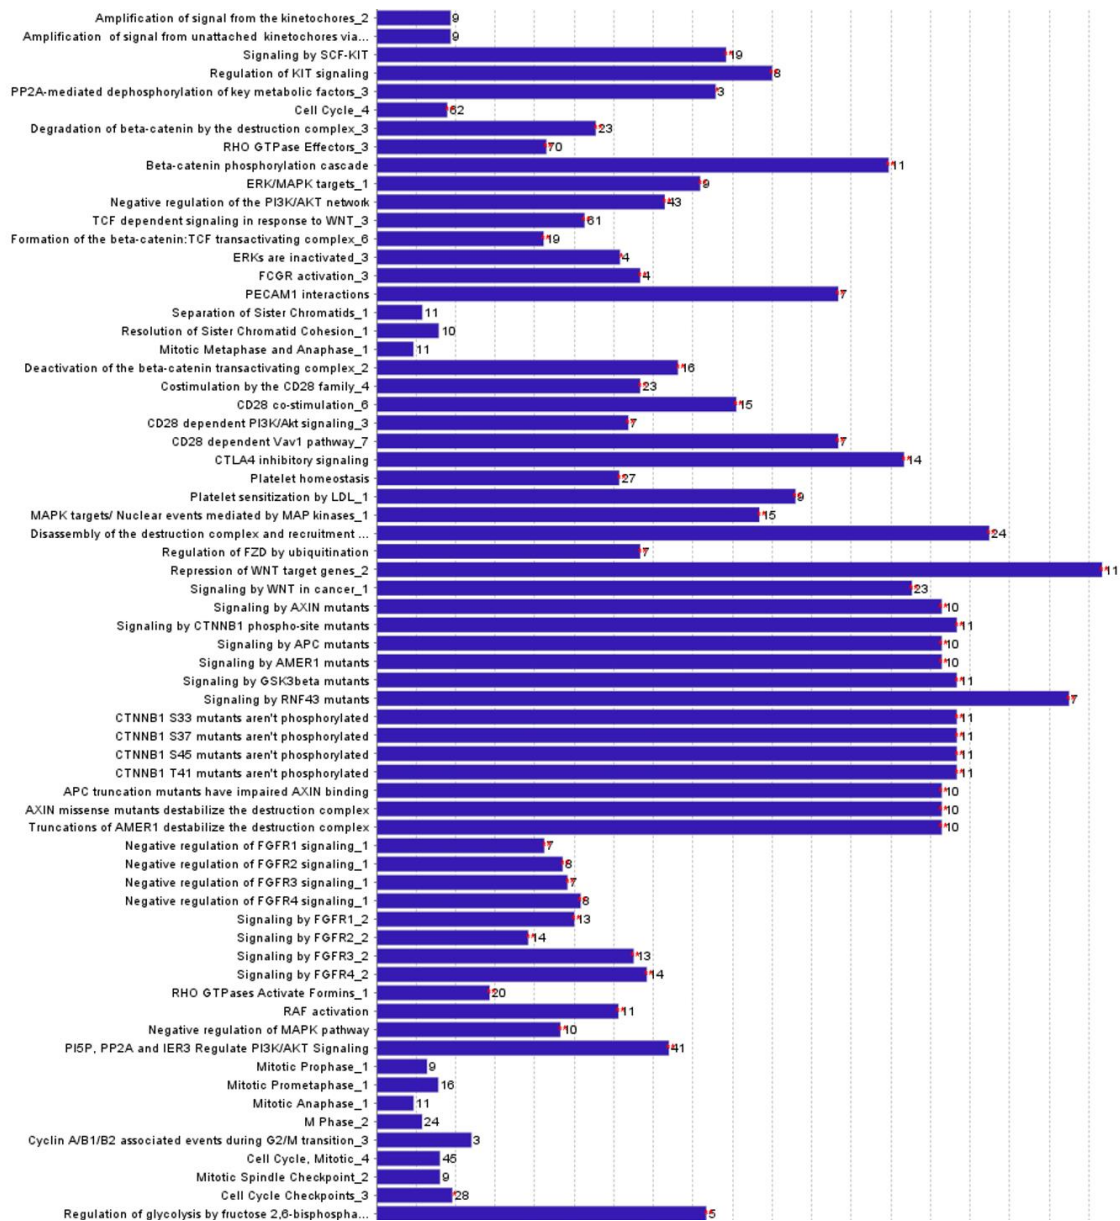

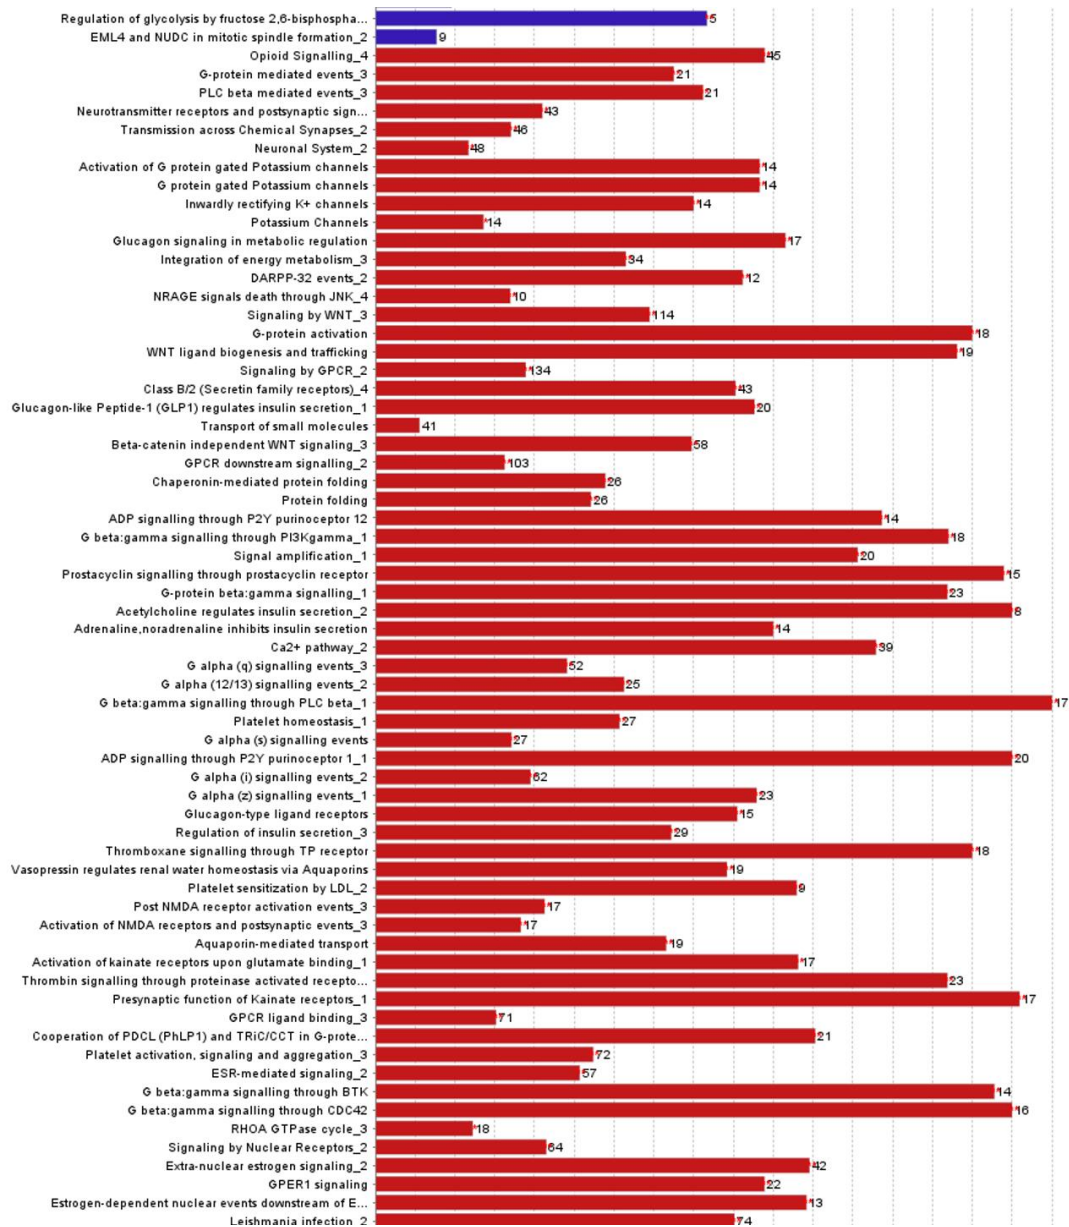

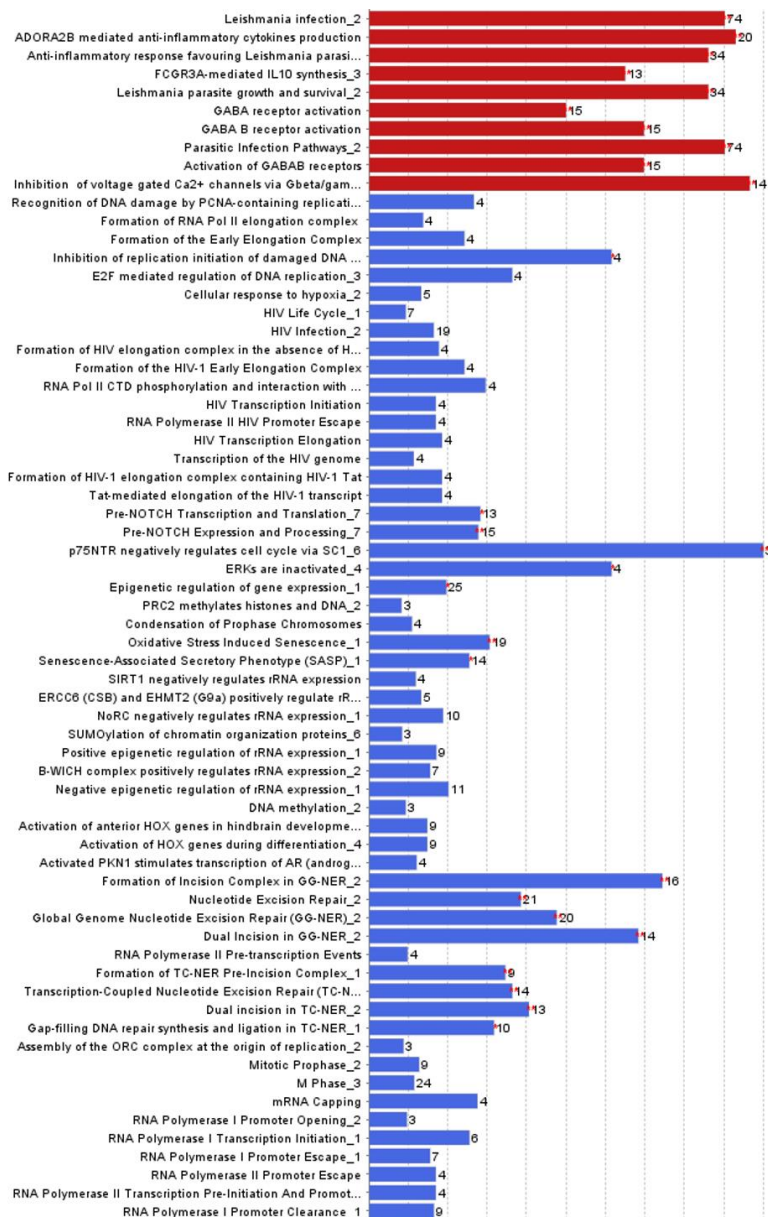

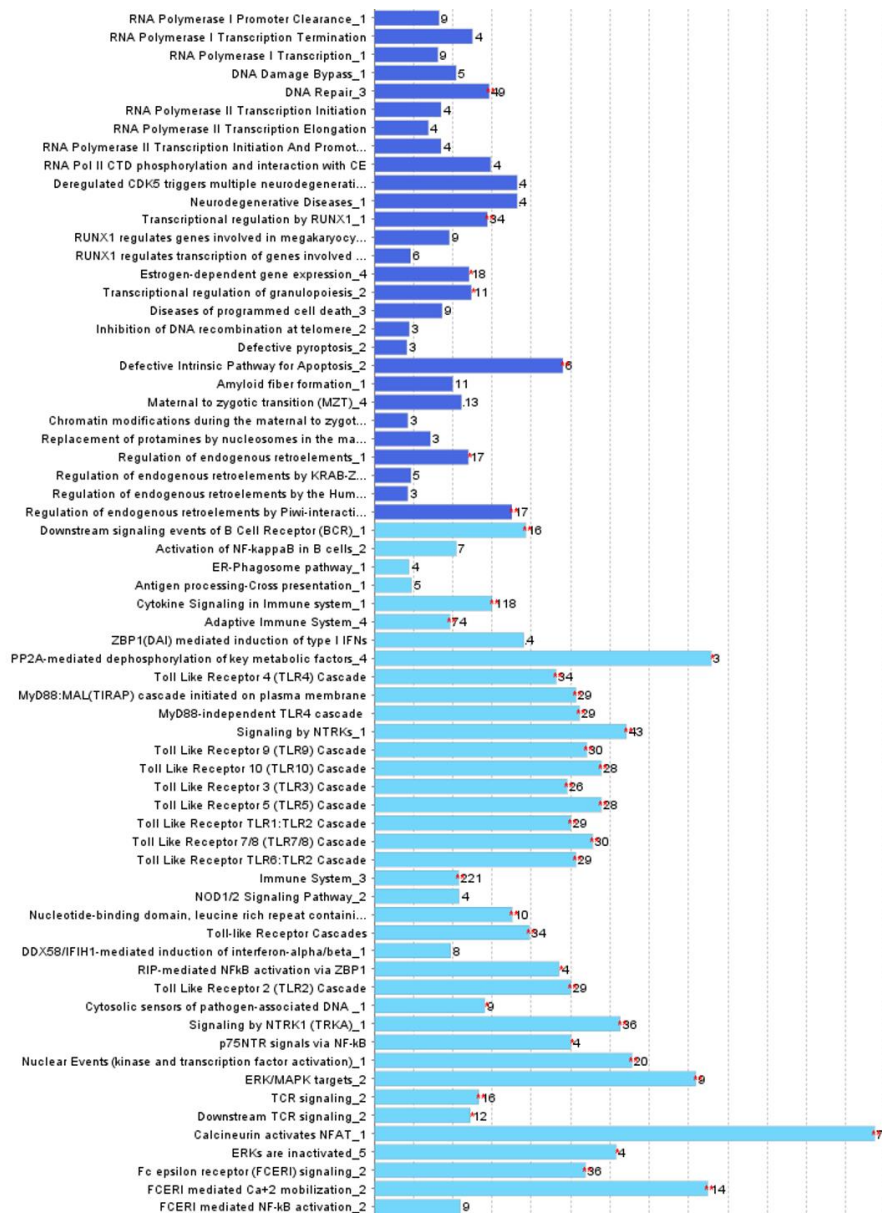

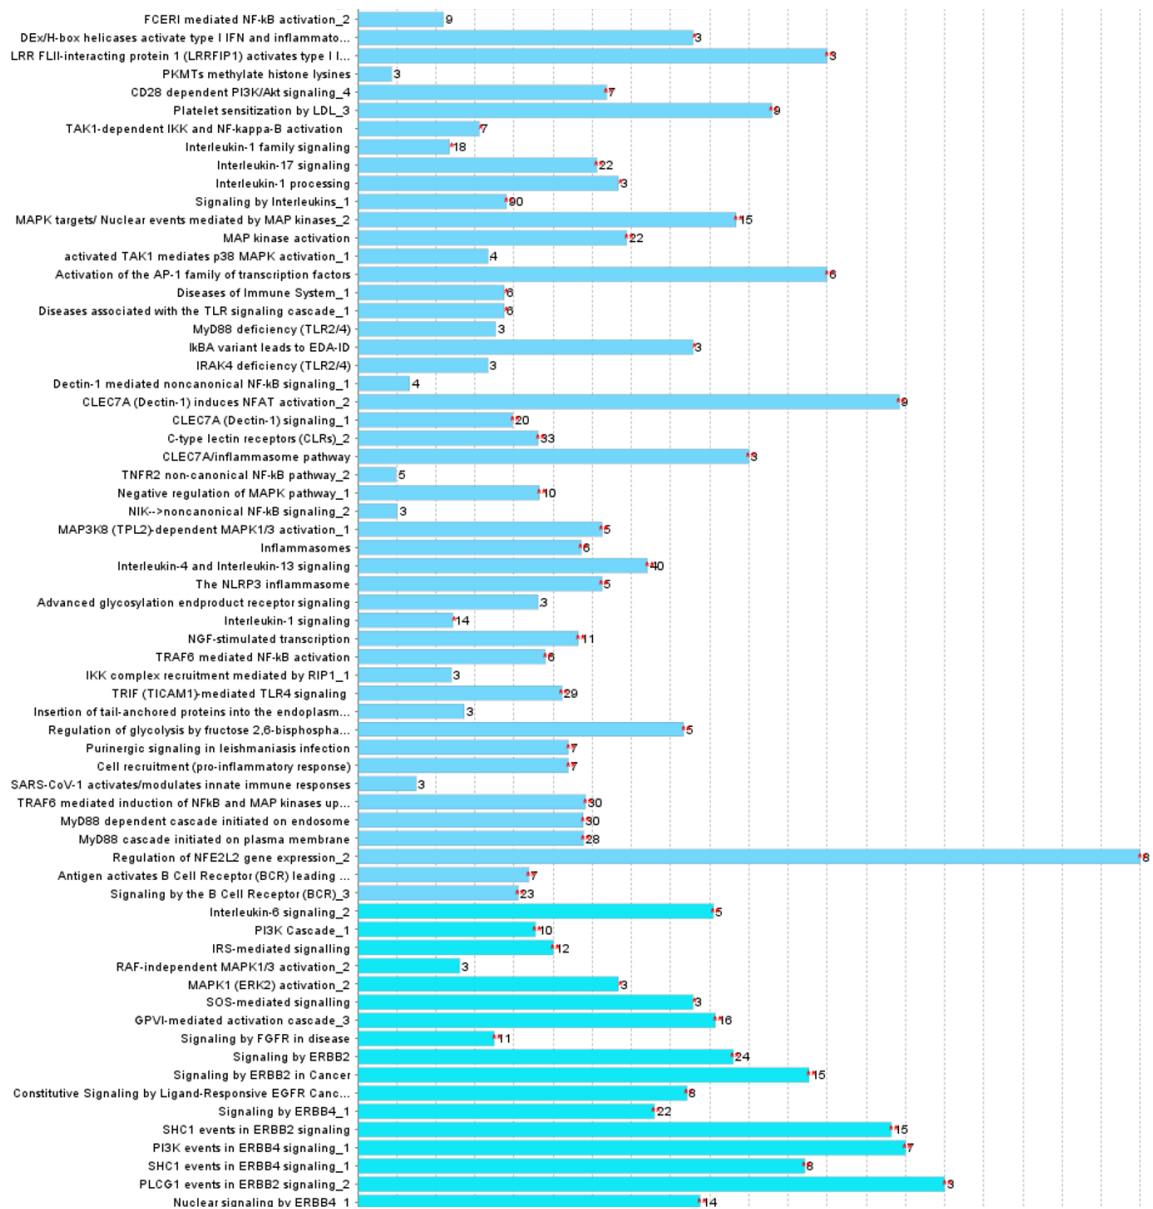

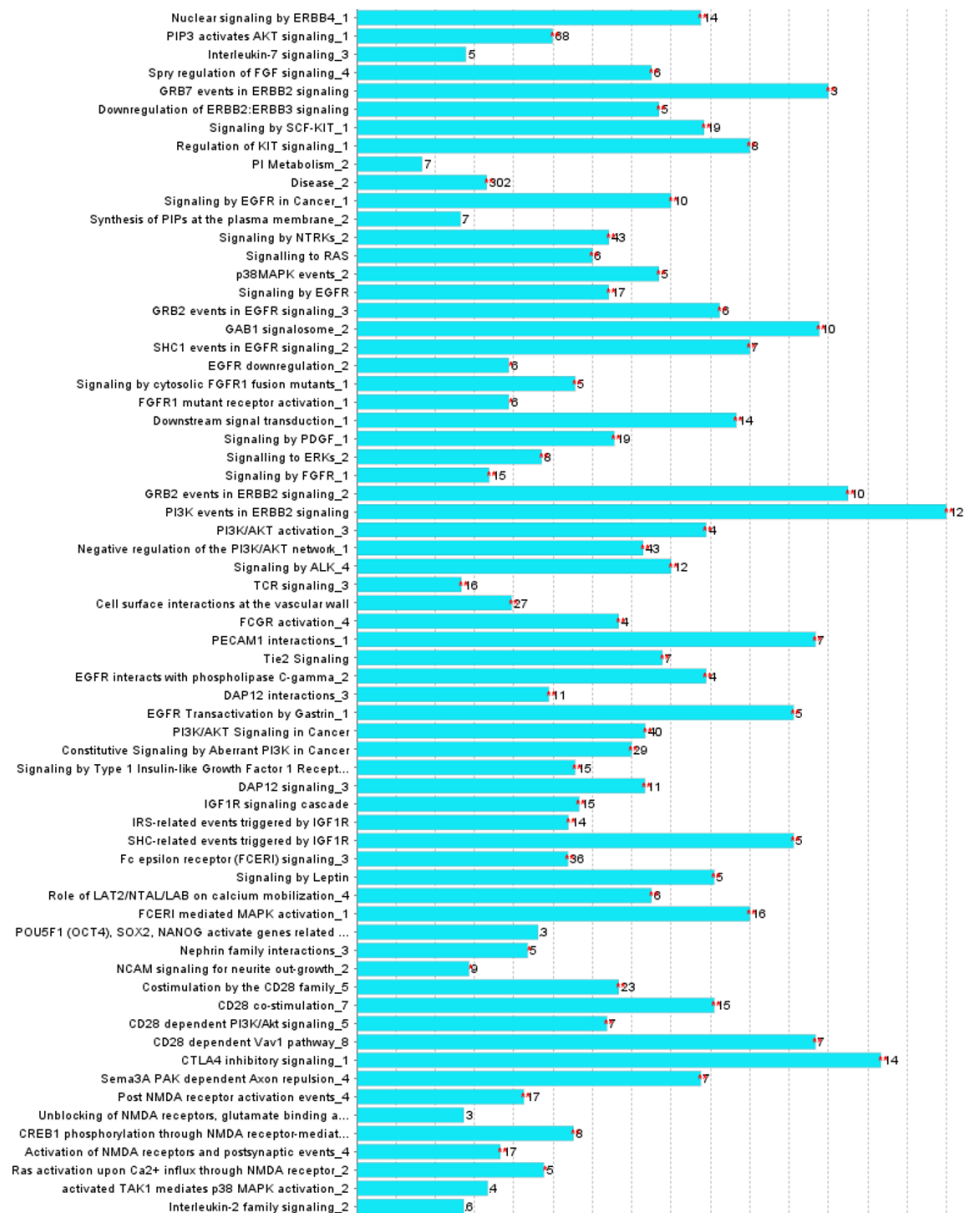



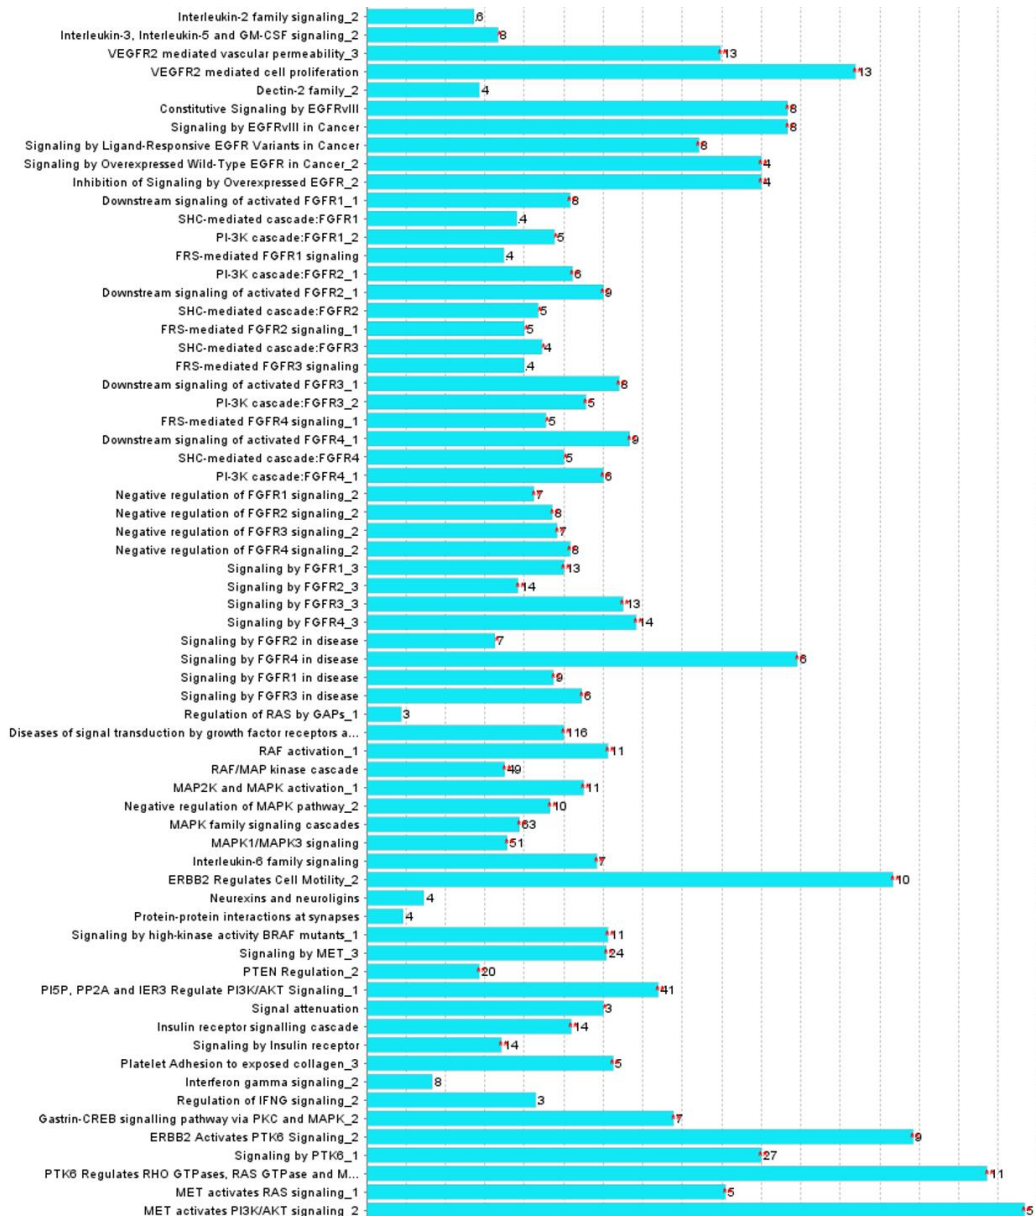

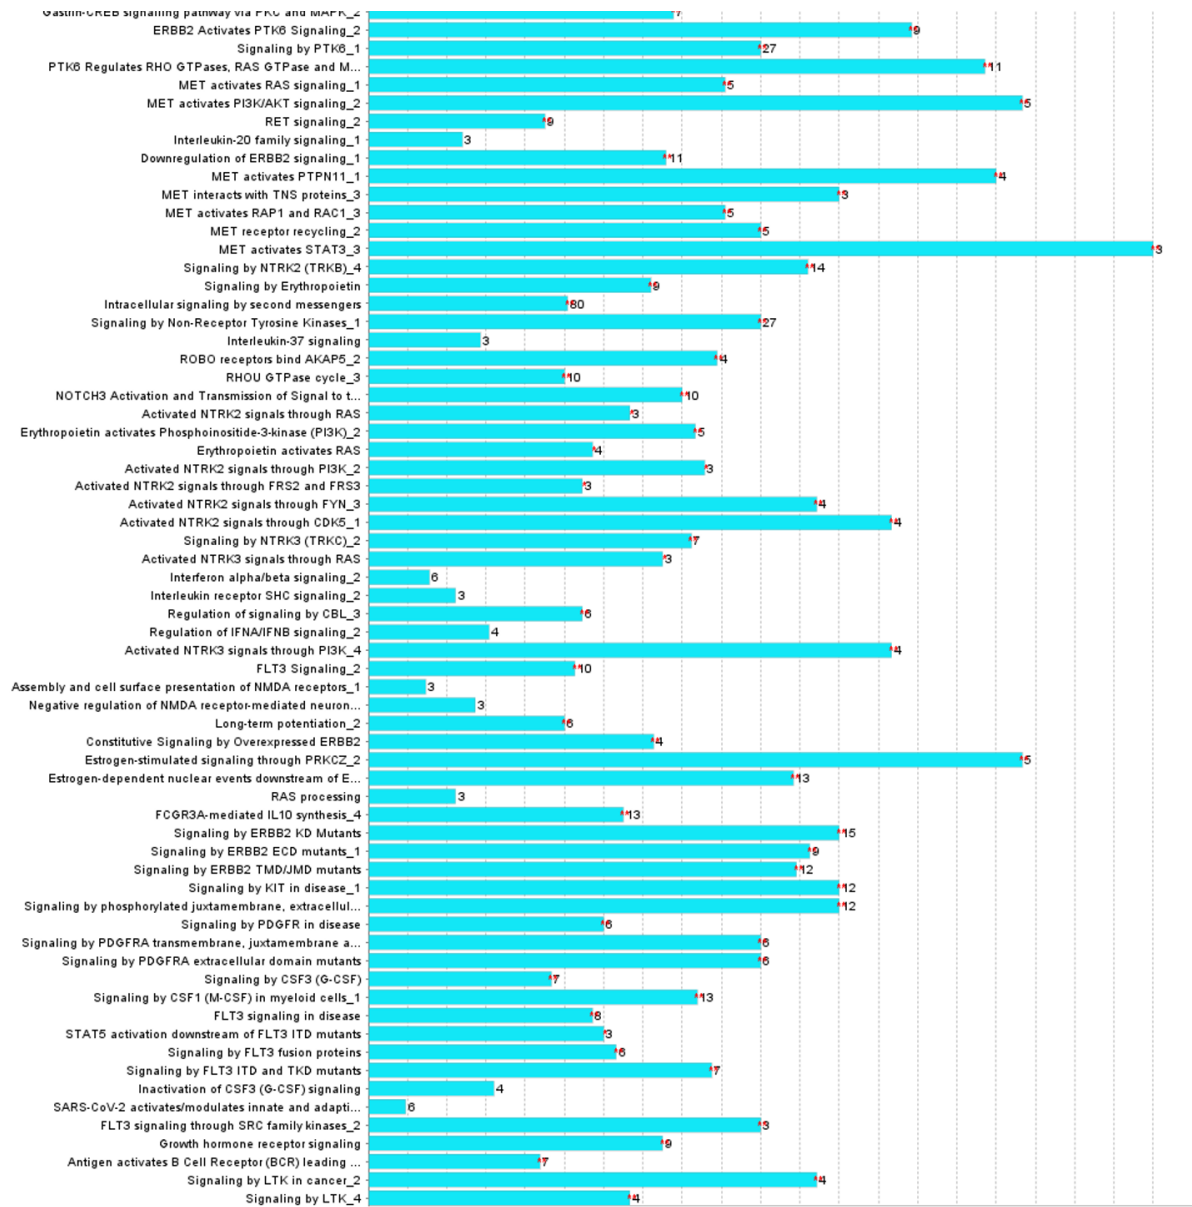

**Table 4S: Terms/signaling pathways in GA-related GIM (sorted by topological coefficient with p values corrected corrected with Benjamini-Hochberg)**

| Term                                                     | Topological Coefficient | P value              | UNIQUE_ID     |
|----------------------------------------------------------|-------------------------|----------------------|---------------|
| Cytochrome c-mediated apoptotic response                 | 1.0                     | 0.03077941836978011  | R-HSA:111461  |
| COPI-mediated anterograde transport                      | 1.0                     | 0.032303979478631784 | R-HSA:6807878 |
| Membrane Trafficking                                     | 0.95                    | 0.017147580936152578 | R-HSA:199991  |
| Vesicle-mediated transport                               | 0.95                    | 0.00996277877449441  | R-HSA:5653656 |
| Laminin interactions                                     | 0.9285714285714286      | 0.029830001939537696 | R-HSA:3000157 |
| Apoptosis                                                | 0.9166666666666666      | 0.032285379855300216 | R-HSA:109581  |
| Programmed Cell Death                                    | 0.9166666666666666      | 0.04872571128296693  | R-HSA:5357801 |
| Loss of function of MECP2 in Rett syndrome               | 0.8666666666666667      | 0.033001603260751265 | R-HSA:9005891 |
| Pervasive developmental disorders                        | 0.8666666666666667      | 0.033001603260751265 | R-HSA:9005895 |
| Loss of MECP2 binding ability to the NCoR/SMRT complex   | 0.8666666666666667      | 0.032293221903259124 | R-HSA:9022537 |
| Regulation of MECP2 expression and activity              | 0.8666666666666667      | 0.018089301915738484 | R-HSA:9022692 |
| Disorders of Nervous System Development                  | 0.8666666666666667      | 0.033001603260751265 | R-HSA:9697154 |
| ER to Golgi Anterograde Transport                        | 0.84                    | 0.017041728977493436 | R-HSA:199977  |
| Asparagine N-linked glycosylation                        | 0.84                    | 0.02818743056405486  | R-HSA:446203  |
| Transport to the Golgi and subsequent modification       | 0.84                    | 0.03545172222555464  | R-HSA:948021  |
| Platelet degranulation                                   | 0.83                    | 0.017316021878206047 | R-HSA:114608  |
| Response to elevated platelet cytosolic Ca <sup>2+</sup> | 0.83                    | 0.01790211946767316  | R-HSA:76005   |
| Regulation of TLR by endogenous ligand                   | 0.83                    | 0.03194047855949558  | R-HSA:5686938 |

|                                                                     |      |                      |               |
|---------------------------------------------------------------------|------|----------------------|---------------|
| <b>Signaling by high-kinase activity BRAF mutants</b>               | 0.83 | 0.046466189073031405 | R-HSA:6802948 |
| <b>Signaling by BRAF and RAF1 fusions</b>                           | 0.83 | 0.03641437116125538  | R-HSA:6802952 |
| <b>Intrinsic Pathway for Apoptosis</b>                              | 0.75 | 0.03640015876644282  | R-HSA:109606  |
| <b>Apoptotic factor-mediated response</b>                           | 0.75 | 0.02817738778075856  | R-HSA:111471  |
| <b>Cellular responses to stress</b>                                 | 0.75 | 0.005276693628432567 | R-HSA:2262752 |
| <b>Infectious disease</b>                                           | 0.75 | 0.03246340881112912  | R-HSA:5663205 |
| <b>Cellular responses to stimuli</b>                                | 0.75 | 0.006796688699894478 | R-HSA:8953897 |
| <b>Viral Infection Pathways</b>                                     | 0.75 | 0.02974680918396593  | R-HSA:9824446 |
| <b>Extracellular matrix organization</b>                            | 0.73 | 0.0322963648151965   | R-HSA:1474244 |
| <b>Integrin signaling</b>                                           | 0.70 | 0.02408799556758114  | R-HSA:354192  |
| <b>Signaling by PDGF</b>                                            | 0.70 | 0.04416119758411886  | R-HSA:186797  |
| <b>Cytoprotection by HMOX1</b>                                      | 0.70 | 0.04816227552410113  | R-HSA:9707564 |
| <b>MyD88:MAL(TIRAP) cascade initiated on plasma membrane</b>        | 0.69 | 0.04947705503115662  | R-HSA:166058  |
| <b>Toll Like Receptor TLR6:TLR2 Cascade</b>                         | 0.69 | 0.04947705503115662  | R-HSA:168188  |
| <b>Mitotic Metaphase and Anaphase</b>                               | 0.68 | 0.021731129328632234 | R-HSA:2555396 |
| <b>Mitotic Anaphase</b>                                             | 0.68 | 0.021905342301370867 | R-HSA:68882   |
| <b>rRNA modification in the nucleus and cytosol</b>                 | 0.66 | 0.01716009127428512  | R-HSA:6790901 |
| <b>rRNA processing in the nucleus and cytosol</b>                   | 0.66 | 0.010071008918313544 | R-HSA:8868773 |
| <b>Assembly of collagen fibrils and other multimeric structures</b> | 0.60 | 0.03110394719900843  | R-HSA:2022090 |
| <b>ECM proteoglycans</b>                                            | 0.60 | 0.03283706291377266  | R-HSA:3000178 |
| <b>Collagen chain trimerization</b>                                 | 0.60 | 0.036675012554702416 | R-HSA:8948216 |
| <b>Cell Cycle</b>                                                   | 0.59 | 0.018467376538773828 | R-HSA:1640170 |
| <b>Cell Cycle, Mitotic</b>                                          | 0.59 | 0.02168314406519144  | R-HSA:69278   |
| <b>DARPP-32 events</b>                                              | 0.58 | 0.02205908844509303  | R-HSA:180024  |

|                                                                        |      |                       |               |
|------------------------------------------------------------------------|------|-----------------------|---------------|
| <b>Platelet sensitization by LDL</b>                                   | 0.58 | 0.006716243284585191  | R-HSA:432142  |
| <b>NCAM signaling for neurite out-growth</b>                           | 0.58 | 0.033035631927149575  | R-HSA:375165  |
| <b>mRNA 3'-end processing</b>                                          | 0.58 | 0.047197336404730485  | R-HSA:72187   |
| <b>Transport of Mature Transcript to Cytoplasm</b>                     | 0.58 | 0.01733189514184999   | R-HSA:72202   |
| <b>Disorders of Developmental Biology</b>                              | 0.58 | 0.033001603260751265  | R-HSA:9675151 |
| <b>mRNA Splicing - Major Pathway</b>                                   | 0.55 | 3.1770569039773987E-7 | R-HSA:72163   |
| <b>mRNA Splicing</b>                                                   | 0.55 | 6.383198641071852E-7  | R-HSA:72172   |
| <b>GRB2:SOS provides linkage to MAPK signaling for Integrins</b>       | 0.55 | 0.03646864389235669   | R-HSA:354194  |
| <b>p130Cas linkage to MAPK signaling for integrins</b>                 | 0.55 | 0.03646864389235669   | R-HSA:372708  |
| <b>Mitotic G2-G2/M phases</b>                                          | 0.53 | 0.04904359332420217   | R-HSA:453274  |
| <b>G2/M Transition</b>                                                 | 0.53 | 0.04842934856210643   | R-HSA:69275   |
| <b>CTLA4 inhibitory signaling</b>                                      | 0.52 | 0.03043086994374417   | R-HSA:389513  |
| <b>Nuclear Envelope (NE) Reassembly</b>                                | 0.52 | 0.018627279867871778  | R-HSA:2995410 |
| <b>Signaling by moderate kinase activity BRAF mutants</b>              | 0.51 | 0.045986472185865504  | R-HSA:6802946 |
| <b>Signaling by RAS mutants</b>                                        | 0.51 | 0.045986472185865504  | R-HSA:6802949 |
| <b>Paradoxical activation of RAF signaling by kinase inactive BRAF</b> | 0.51 | 0.045986472185865504  | R-HSA:6802955 |
| <b>Signaling downstream of RAS mutants</b>                             | 0.51 | 0.045986472185865504  | R-HSA:9649948 |
| <b>Signaling by RAF1 mutants</b>                                       | 0.51 | 0.03510154802392978   | R-HSA:9656223 |
| <b>M Phase</b>                                                         | 0.51 | 0.021703782367382473  | R-HSA:68886   |
| <b>Aerobic respiration and respiratory electron transport</b>          | 0.50 | 0.03502850716909681   | R-HSA:1428517 |
| <b>snRNP Assembly</b>                                                  | 0.50 | 0.03254398990402931   | R-HSA:191859  |

|                                                                              |      |                       |               |
|------------------------------------------------------------------------------|------|-----------------------|---------------|
| <b>MASTL Facilitates Mitotic Progression</b>                                 | 0.50 | 0.017717009334540117  | R-HSA:2465910 |
| <b>Metabolism of proteins</b>                                                | 0.50 | 0.009207695633988296  | R-HSA:392499  |
| <b>Axon guidance</b>                                                         | 0.50 | 0.016785594278522928  | R-HSA:422475  |
| <b>mRNA decay by 3' to 5' exoribonuclease</b>                                | 0.50 | 0.04195902417660218   | R-HSA:429958  |
| <b>MAPK targets/ Nuclear events mediated by MAP kinases</b>                  | 0.50 | 0.03284753842766893   | R-HSA:450282  |
| <b>TP53 Regulates Metabolic Genes</b>                                        | 0.50 | 0.04723898496996881   | R-HSA:5628897 |
| <b>Metabolism of amino acids and derivatives</b>                             | 0.50 | 0.006803327675130781  | R-HSA:71291   |
| <b>Translation</b>                                                           | 0.50 | 0.036856802790047424  | R-HSA:72766   |
| <b>Glycogen metabolism</b>                                                   | 0.50 | 0.049312230020330465  | R-HSA:8982491 |
| <b>ERK/MAPK targets</b>                                                      | 0.45 | 0.03194047855949558   | R-HSA:198753  |
| <b>Cellular response to chemical stress</b>                                  | 0.45 | 0.0236541804627481    | R-HSA:9711123 |
| <b>Cyclin A/B1/B2 associated events during G2/M transition</b>               | 0.44 | 0.041876234163061854  | R-HSA:69273   |
| <b>SRP-dependent cotranslational protein targeting to membrane</b>           | 0.42 | 0.0326069815374156    | R-HSA:1799339 |
| <b>Selenoamino acid metabolism</b>                                           | 0.42 | 0.025768346695481757  | R-HSA:2408522 |
| <b>RAF activation</b>                                                        | 0.42 | 0.046466189073031405  | R-HSA:5673000 |
| <b>Transport of Mature mRNA derived from an Intron-Containing Transcript</b> | 0.42 | 0.018627279867871778  | R-HSA:159236  |
| <b>Major pathway of rRNA processing in the nucleolus and cytosol</b>         | 0.40 | 0.025460446702795705  | R-HSA:6791226 |
| <b>rRNA processing</b>                                                       | 0.40 | 0.017418965543868823  | R-HSA:72312   |
| <b>Platelet activation, signaling and aggregation</b>                        | 0.38 | 0.036958991533182606  | R-HSA:76002   |
| <b>Integrin cell surface interactions</b>                                    | 0.38 | 0.04840319342321396   | R-HSA:216083  |
| <b>Processing of Capped Intron-</b>                                          | 0.38 | 1.2863864573279597E-7 | R-HSA:72203   |

|                                                                         |       |                       |               |
|-------------------------------------------------------------------------|-------|-----------------------|---------------|
| <b>Containing Pre-mRNA</b>                                              |       |                       |               |
| <b>PP2A-mediated dephosphorylation of key metabolic factors</b>         | 0.38  | 0.032293221903259124  | R-HSA:163767  |
| <b>Regulation of glycolysis by fructose 2,6-bisphosphate metabolism</b> | 0.38  | 0.026713025026585815  | R-HSA:9634600 |
| <b>Metabolism of non-coding RNA</b>                                     | 0.375 | 0.03254398990402931   | R-HSA:194441  |
| <b>Mitotic Prophase</b>                                                 | 0.35  | 0.032184383060804116  | R-HSA:68875   |
| <b>ERKs are inactivated</b>                                             | 0.34  | 0.03077941836978011   | R-HSA:202670  |
| <b>Metabolism of carbohydrates</b>                                      | 0.33  | 0.04825103104814824   | R-HSA:71387   |
| <b>Disease</b>                                                          | 0.32  | 0.04175717465660903   | R-HSA:1643685 |
| <b>Glycolysis</b>                                                       | 0.31  | 0.030479583649003734  | R-HSA:70171   |
| <b>Glucose metabolism</b>                                               | 0.31  | 0.04723898496996881   | R-HSA:70326   |
| <b>Metabolism</b>                                                       | 0.25  | 2.783842857413548E-4  | R-HSA:1430728 |
| <b>Deadenylation-dependent mRNA decay</b>                               | 0.25  | 1.8880161142073435E-4 | R-HSA:429914  |
| <b>Metabolism of RNA</b>                                                | 0.24  | 1.653600516017647E-12 | R-HSA:8953854 |
| <b>Glutathione conjugation</b>                                          | 0.0   | 0.046466189073031405  | R-HSA:156590  |
| <b>Metabolism of nucleotides</b>                                        | 0.0   | 0.04890606133035483   | R-HSA:15869   |
| <b>HIV Life Cycle</b>                                                   | 0.0   | 0.04157605624452897   | R-HSA:162587  |
| <b>Late Phase of HIV Life Cycle</b>                                     | 0.0   | 0.030698987338338448  | R-HSA:162599  |
| <b>Innate Immune System</b>                                             | 0.0   | 0.047184009545942     | R-HSA:168249  |
| <b>Initiation of Nuclear Envelope (NE) Reformation</b>                  | 0.0   | 0.024990348646255302  | R-HSA:2995383 |
| <b>Scavenging by Class A Receptors</b>                                  | 0.0   | 0.024990348646255302  | R-HSA:3000480 |
| <b>Glycogen synthesis</b>                                               | 0.0   | 0.033001603260751265  | R-HSA:3322077 |
| <b>Transcriptional Regulation by TP53</b>                               | 0.0   | 0.03194405399919193   | R-HSA:3700989 |
| <b>mRNA decay by 5' to 3' exoribonuclease</b>                           | 0.0   | 0.017586923244728072  | R-HSA:430039  |
| <b>Smooth Muscle Contraction</b>                                        | 0.0   | 0.03943813508117212   | R-HSA:445355  |

|                                                                                            |     |                      |               |
|--------------------------------------------------------------------------------------------|-----|----------------------|---------------|
| <b>Synthesis of GDP-mannose</b>                                                            | 0.0 | 0.026335567668901057 | R-HSA:446205  |
| <b>Butyrate Response Factor 1 (BRF1) binds and destabilizes mRNA</b>                       | 0.0 | 0.04730442120502561  | R-HSA:450385  |
| <b>Fructose metabolism</b>                                                                 | 0.0 | 0.032293221903259124 | R-HSA:5652084 |
| <b>Diseases of signal transduction by growth factor receptors and second messengers</b>    | 0.0 | 0.03543770700709452  | R-HSA:5663202 |
| <b>Respiratory electron transport</b>                                                      | 0.0 | 0.017519376237775018 | R-HSA:611105  |
| <b>Signaling by PTK6</b>                                                                   | 0.0 | 0.020093446265703075 | R-HSA:8848021 |
| <b>Signaling by Non-Receptor Tyrosine Kinases</b>                                          | 0.0 | 0.020093446265703075 | R-HSA:9006927 |
| <b>Nervous system development</b>                                                          | 0.0 | 0.017784086016500188 | R-HSA:9675108 |
| <b>M-decay: degradation of maternal mRNAs by maternally stored factors</b>                 | 0.0 | 0.03675061929732784  | R-HSA:9820841 |
| <b>Respiratory syncytial virus (RSV) genome replication, transcription and translation</b> | 0.0 | 0.04195902417660218  | R-HSA:9820965 |
| <b>Maturation of hRSV A proteins</b>                                                       | 0.0 | 0.03077941836978011  | R-HSA:9828806 |
| <b>Mitochondrial protein degradation</b>                                                   | 0.0 | 0.04848782603948083  | R-HSA:9837999 |



**Table S5: 330 out of 865 hub proteins with PPI >3 in GA-related GIM**

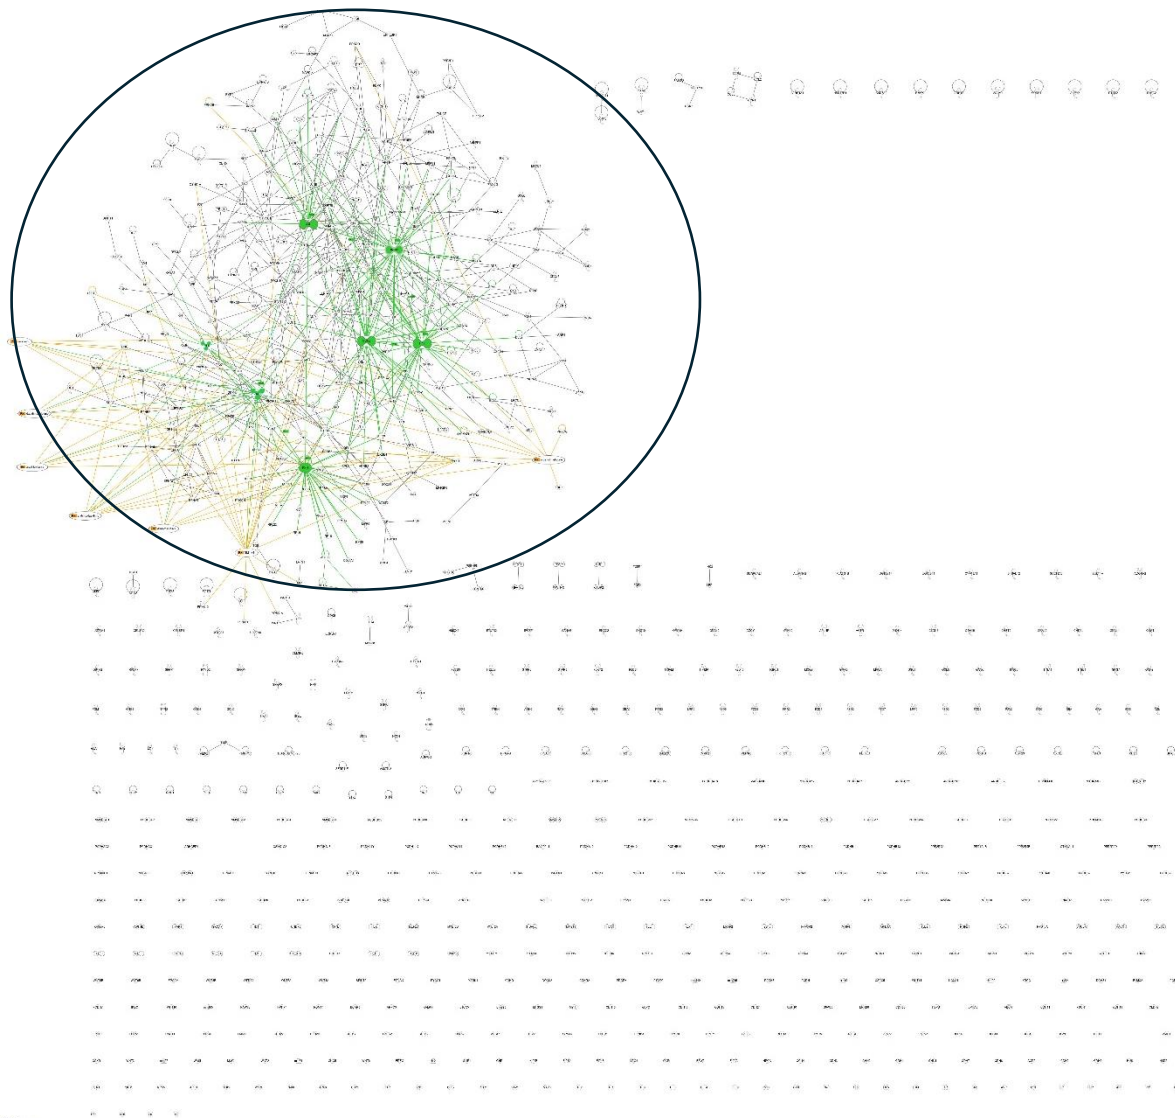

- ABI1
- ABL1
- ACTB
- ACTG1
- ACTR2
- ACTR3
- AIRE
- AKT1
- AP2A2
- AP2B1
- AP2M1
- AP2S1
- APC

APP  
AR  
AREG  
ARHGEF7  
ARPC2  
ARPC5  
ARR3  
ARRB1  
ARRB2  
ATF2  
ATF4  
ATM  
ATR  
AXIN1  
AXL  
BCAR1  
BCL2  
BCR  
BMP7  
BMPR2  
BMPR1B  
BRCA1  
BRCA2  
BTRC  
CASP3  
CCN2  
CCND1  
CCNH  
CD44  
CD40LG  
CDC42  
CDH1  
CDH5  
CDKN1A  
CDKN1B  
CDKN2A  
CFL1  
CHEK1  
CHEK2  
CHUK  
COL1A1  
CREB1  
CREBBP  
CRK  
CSF1  
CSNK1A1  
CSNK1D  
CSNK1G3

CSNK2A1  
CSNK2A2  
CSNK2B  
CTBP1  
CTNNA1  
CTNNB1  
CTNND1  
CTTN  
CUL4A  
CUL4B  
CXCL12  
CXCR4  
DCAF1  
DDB1  
DDB2  
DDIT3  
DNM1  
DOCK1  
DRD1  
DVL1  
DVL2  
DVL3  
E2F1  
EEF1A1  
EEF1E1  
EFNA1  
EFNA3  
EFNA4  
EFNA5  
EFNB1  
EFNB2  
EGF  
EGFR  
EGR1  
EIF2AK2  
EIF2B1  
EIF2S1  
EIF2S2  
EIF4A1  
EIF4E  
EIF4EBP1  
EIF4G1  
ELK1  
ELMO1  
EP300  
EP400  
EPHA2  
EPHA3

EPHA4  
EPHA6  
EPHA7  
EPHA10  
EPHB1  
EPHB2  
ERBB2  
ERBB3  
ERBB4  
ERCC1  
ERCC2  
ERCC3  
ERCC4  
ERCC5  
ETS1  
EZR  
FANCA  
FANCC  
FANCD2  
FANCE  
FANCF  
FANCG  
FBXW11  
FER  
FKBP1A  
FN1  
FOS  
FRMD6  
FYN  
GAB1  
GH1  
GHR  
GNB1  
GNB2  
GNB3  
GNG2  
GNG4  
GNG13  
GNGT1  
GPNMB  
GRIN1  
GRIN2B  
GRK2  
GRM1  
GSK3B  
H3-3A/H3-3B  
HDAC1  
HDAC2

HDAC3  
HGF  
HGFAC  
HIF1A  
HMGB1  
HMGN1  
HRAS  
IGF1  
IGF1R  
IGFBP4  
ILK  
IRS1  
ITGA2  
ITGA2B  
ITGB1  
ITGB2  
ITGB3  
ITPR1  
ITSN1  
JUN  
JUNB  
KEAP1  
KIT  
KLF6  
KRT19  
LATS1  
LCK  
LEF1  
LIMK1  
LYN  
MAFG  
MAFK  
MAML1  
MAP2K4  
MAP2K6  
MAP3K1  
MAP3K5  
MAPK1  
MAPK8  
MAPK14  
MAPKAPK2  
MAX  
MCL1  
MDM2  
MET  
MKNK1  
MLH1  
MRE11

MSH2  
MTOR  
MYC  
MYH9  
MYL6  
NBN  
NCF2  
NF2  
NFATC1  
NFATC2  
NFE2L2  
NFKB1  
NFYC  
NGEF  
NOTCH1  
NR2C2  
NRG1  
NRG3  
PAK1  
PAK3  
PARP1  
PCBD1  
PDPK1  
PGF  
PHLPP1  
PIK3CA  
PIK3CG  
PIK3R1  
PIP5K1A  
PLAUR  
PLCB2  
POR  
PPP1CA  
PPP2CA  
PPP3CA  
PPP3R1  
PRKCA  
PRKCB  
PRKCD  
PRKCE  
PRKCG  
PRKCH  
PRKCI  
PRKCQ  
PRKCZ  
PRKD1  
PSEN2  
PTEN

PTK2  
PTPN11  
PTTG1  
PXN  
RAC1  
RAD50  
RAD51  
RAD9A  
RASA1  
RB1  
RELA  
RHEB  
RHOA  
RNF41  
ROCK1  
ROCK2  
RPA1  
RPL5  
RPL6  
RPL9  
RPL11  
RPL13  
RPL15  
RPL22  
RPL23  
RPL26  
RPL38  
RPS6  
RPS7  
RPS14  
RPS23  
RPS24  
RPS6KA5  
RPSA  
SDC1  
SDC2  
SDCBP  
SHC1  
SIAH1  
SIRT1  
SKIL  
SMAD1  
SMAD2  
SMAD4  
SMARCA4  
SMARCA5  
SMARCE1  
SNAI1

SOCS3  
SP1  
SPINT1  
SRC  
SREBF1  
STAT1  
STAT3  
TAMALIN  
TBL1X  
TCF7L2  
TIAM1  
TLE1  
TLE5  
TP53  
TP63  
TREX1  
TSC1  
TSC2  
TXN  
USP7  
VAV2  
VCP  
VEGFA  
WASF2  
XIAP  
XPA  
XPC  
YES1  
YY1



**Table S6: Immunohistochemistry of the hub proteins and cell types (by scRNAseq) at Human Protein Atlas and RNA expression. Note: quantities of immunostaining from none (0), <25%, 25-75% and >75% shown under each protein. \*\*, \*\*\*:  $q < 0.05$ ,  $0.01$ .**

| Protein | Antibody               | Diagnosis  | Patient information      | URL                                                                    | Quantity | Cell types                                          | RNA (Log2FC) |
|---------|------------------------|------------|--------------------------|------------------------------------------------------------------------|----------|-----------------------------------------------------|--------------|
| EGFR    | CAB000035              | Normal/GIM | Male, age 72, id: 301    | v23.proteinatlas.org/ENSG00000146648-EGFR/tissue/stomach#img           | 25-75%   | Goblet cells and fibroblasts                        | 0.009        |
|         |                        | GA         | Female, age 50, id: 664  | v23.proteinatlas.org/ENSG00000146648-EGFR/pathology/stomach+cancer#img | >75%     |                                                     | 0.032        |
| SRC     | HPA030875              | Normal/GIM | Female, age 81, id: 526  | v23.proteinatlas.org/ENSG00000197122-SRC/tissue/stomach#img            | 25-75%   | Goblet cells                                        | 0.027        |
|         |                        | GA         | Male, age 59, id: 2378   | v23.proteinatlas.org/ENSG00000197122-SRC/pathology/stomach+cancer#img  | >75%     |                                                     | 0.497***     |
| PXN     | CAB003841              | Normal/GIM | Male, age 56, id: 338    | v23.proteinatlas.org/ENSG00000089159-PXN/tissue/stomach#img            | 0        | Goblet cells, fibroblasts, T cells, and macrophages | 0.276***     |
|         |                        | GA         | Female, age 86, id: 549  | v23.proteinatlas.org/ENSG00000089159-PXN/pathology/stomach+cancer#img  | >75%     |                                                     | 0.371**      |
| JUN     | HPA066898<br>HPA066898 | Normal/GIM | Female, age 57, id: 1467 | v23.proteinatlas.org/ENSG00000177606-JUN/tissue/stomach#img            | 25-75%   | Goblet cells, fibroblasts, plasma cells and T cells | 0.256***     |
|         |                        | GA         | Male, age 54, id: 319    | v23.proteinatlas.org/ENSG00000177606-JUN/pathology/stomach+cancer#img  | >75%     |                                                     | -0.693***    |

|               |               |                |                               |                                                                                              |        |                                                                                                                |          |
|---------------|---------------|----------------|-------------------------------|----------------------------------------------------------------------------------------------|--------|----------------------------------------------------------------------------------------------------------------|----------|
| <b>BRCA1</b>  | CAB0019<br>46 | Normal/G<br>IM | Female, age<br>56, id: 2130   | v23.proteinatla<br>s.org/ENSG00<br>000012048-<br>BRCA1/tissue/<br>stomach#img                | <25%   | Plasm<br>a cells<br>and B<br>cells                                                                             | -0.020   |
|               |               | GA             | Male, age<br>71, id: 703      | v23.proteinatla<br>s.org/ENSG00<br>000012048-<br>BRCA1/pathol<br>ogy/stomach+<br>cancer#img  | >75%   |                                                                                                                | -0.012   |
| <b>p53</b>    | CAB0392<br>38 | Normal/G<br>IM | Female, age<br>57<br>id: 1467 | v23.proteinatla<br>s.org/ENSG00<br>000141510-<br>TP53/tissue/st<br>omach#img                 | 25-75% | Goblet<br>cells, T<br>cells,<br>macro<br>phages<br>, B<br>cells,<br>and<br>plasm<br>a cells                    | 0.011    |
|               |               | GA             | Male, age 48,<br>id: 3044     | v23.proteinatla<br>s.org/ENSG00<br>000141510-<br>TP53/patholog<br>y/stomach+ca<br>ncer#img   | >75%   |                                                                                                                | -0.046   |
| <b>MDM2</b>   | CAB0000<br>86 | Normal/G<br>IM | Female, age<br>56, id: 3233   | v23.proteinatla<br>s.org/ENSG00<br>000135679-<br>MDM2/tissue/s<br>tomach#img                 | >75%   | Plasm<br>a cells,<br>T cells,<br>macro<br>phages<br>,<br>goblet<br>cells,<br>fibrobl<br>asts                   | 0.060    |
|               |               | GA             | Male, age<br>59, id: 2473     | v23.proteinatla<br>s.org/ENSG00<br>000135679-<br>MDM2/patholo<br>gy/stomach+c<br>ancer#img   | >75%   |                                                                                                                | 0.065    |
| <b>CTNNB1</b> | CAB0019<br>50 | Normal/<br>IM  | Female, age<br>81, id: 526    | V23.proteinatl<br>as.org/ENSG00<br>000168036-<br>CTNNB1/tissu<br>e/stomach#im<br>g           | 25-75% | T cells,<br>macro<br>phages<br>, B<br>cells,<br>plasm<br>a cells,<br>fibrobl<br>asts<br>and<br>goblet<br>cells | 0.1134   |
|               |               | GA             | Male, age 63,<br>id: 1207     | V23.proteinatl<br>as.org/ENSG00<br>000168036-<br>CTNNB1/patho<br>logy/stomach+<br>cancer#img | >75%   |                                                                                                                | 0.3326** |
| <b>CD44</b>   | HPA0057<br>85 | Normal/G<br>IM | Female, age<br>56, id: 2130   | v23.proteinatla<br>s.org/ENSG00<br>000026508-<br>CD44/tissue/st<br>omach#img                 | 0      | T cells,<br>macro<br>phages<br>, B<br>cells,                                                                   | 0.839*** |

|  |  |    |                           |                                                                       |   |                                               |          |
|--|--|----|---------------------------|-----------------------------------------------------------------------|---|-----------------------------------------------|----------|
|  |  | GA | Male, age 76,<br>id: 2066 | v23.proteinatlas.org/ENSG0000026508-CD44/pathology/stomach+cancer#img | 0 | plasma cells,<br>fibroblasts,<br>goblet cells | 1.483*** |
|--|--|----|---------------------------|-----------------------------------------------------------------------|---|-----------------------------------------------|----------|
